1 **Title:** Agnostic fungi: plant traits and tissue stoichiometry explain nutrient transfer in common  
2 arbuscular mycorrhizal networks of temperate grasslands

3  
4 **Authors:** Hilary Rose Dawson<sup>1</sup>, Katherine L. Shek<sup>1,2</sup>, Toby M. Maxwell<sup>1,3</sup>, Paul B. Reed<sup>1,4</sup>,  
5 Barbara Bomfim<sup>1,5</sup>, Scott D. Bridgham<sup>1</sup>, Brendan J. M. Bohannan<sup>1</sup>, Lucas C.R. Silva<sup>1,6</sup>

6 **Affiliations:**

7 1. Institute of Ecology and Evolution, University of Oregon, Eugene, OR 97403 USA

8 2. Department of Natural Resources and the Environment, University of New Hampshire,  
9 Durham NH 03824

10 3. Department of Biological Sciences, Boise State University, Boise, Idaho, 83725 USA

11 4. Institute for Applied Ecology, Corvallis, OR 97333 USA

12 5. Climate and Ecosystem Sciences Division, Lawrence Berkeley National Laboratory, Berkeley,  
13 CA 94720 USA

14 6. Environmental Studies Program, University of Oregon, Eugene, OR 97403 USA  
15

16 **Abstract:**

17 Plants and mycorrhizal fungi form close mutualistic relationships that affect the structure and  
18 function of ecosystems. Common mycorrhizal networks (many plants associated with the same  
19 fungus) can facilitate preferential transfer of carbon and limiting nutrients. The mechanisms  
20 behind these networks remain poorly understood. Do common mycorrhizal networks favor  
21 fungal growth at the expense of plant resource demands (a fungi-centric view), or are they  
22 passive channels through which plants regulate resource fluxes (a plant-centric view)? In  
23 experimental restored prairie and introduced pasture systems in the Pacific Northwest, USA, we  
24 used stable isotope tracers (<sup>13</sup>C and <sup>15</sup>N), paired with analyses of plant traits and fungal  
25 community DNA, to quantify above- and belowground allocation and transfer of carbon and  
26 nitrogen between 18 plant species. We measured isotopic enrichment of >1,800 leaves and roots,  
27 and found morphological plant traits and tissue stoichiometry were the most important  
28 predictors of interspecific resource transfer. Labeled "donor" plants assimilated isotopic tracers  
29 at similar rates; however, nitrogen was preferentially transferred to annual and forb "receiver"  
30 plants compared to perennial and grass receiver plants due to differences in tissue stoichiometry.  
31 Our findings point to a simple mechanistic answer for long-standing questions regarding  
32 mutualism and transfer of resources between plants via mycorrhizal networks.

### 33 **Introduction**

34 Plant-mycorrhizal associations are thought to have emerged as rudimentary root systems  
35 over 400 million years ago, facilitating the expansion of terrestrial life that followed (Kenrick &  
36 Strullu-Derrien, 2014). The transformative power of early fungal symbioses is still evident today  
37 in all major plant lineages, from bryophytes to angiosperms, all of which form mycorrhizal  
38 connections (van der Heijden et al. 2015). Over 85% of all contemporary flowering plant species  
39 form symbioses with fungi, with arbuscular mycorrhizal (AM) associations being the most  
40 common (Brundrett 2009). Today, the relationships between plants and AM fungi dominates  
41 both managed and unmanaged landscapes and are estimated to be responsible for up to 80% of  
42 global primary productivity (van der Heijden et al. 2015). Fungi are gregarious and form  
43 partnerships with more than one individual plant (Selosse et al. 2006). By extension, it has been  
44 widely hypothesized that the multi-plant-fungal relationships form “common mycorrhizal  
45 networks” (CMNs) which facilitate carbon and nutrient transfer between organisms, beyond the  
46 immediate plant-fungus mutualism formed by individuals. This relationship is often simplified to  
47 the mutual exchange of carbon-based compounds created by plant photosynthesis for limiting  
48 soil nutrients mined by fungi (Smith and Read 2008), but is known to exist along a continuum  
49 from parasitic to mutualistic (Johnson et al. 1997, Klironomos 2003, Mariotte et al. 2013). A  
50 synthesis of empirical research at macro- and micro-levels of ecological organization reveals a  
51 gap in understanding of structural and functional properties that could predict how carbon and  
52 nutrients are transferred in CMNs (Silva and Lambers 2021).

53 The literature holds myriad and often complimentary, but sometimes contradictory  
54 hypotheses that could explain the CMN mutualism as a key structural and functional component  
55 of ecosystems. For example, the “Wood Wide Web” hypothesis emerged from the analysis of  
56 isotopically labeled carbon transferred between plants, presumably through fungal mycorrhizae  
57 (Simard et al. 1997). This observation set the foundation for economic analogies based on the  
58 idea that certain plants which allocate carbon to sustain common fungal symbionts can also  
59 benefit from shared nutrients, while plants associating with different mycorrhizal fungi cannot.  
60 The “economics” hypothesis (Kiers et al. 2011) proposes that plants and fungi engage in “trades”  
61 of nutrients mined by fungi in exchange for carbon-based photosynthates from plants (Fellbaum  
62 et al. 2014, Werner and Dubbert 2016, Averill et al. 2019). In this hypothesis, the terms of trade  
63 between plant and fungi are mediated by supply and demand for limiting resources, which could

64 create a dynamic market emerging from interactions between environmental, biochemical, and  
65 biophysical variables. Complementing the economic analogy, the “kinship” hypothesis proposes  
66 that phylogenetic distance within or across species promotes functional gradients and preferential  
67 flow of resources in CMNs (Tedersoo et al. 2020), in which transfer of carbon and nutrients are  
68 predicted to be more frequent and abundant between related individuals (e.g., seedlings and trees  
69 of the same species) than between unrelated individuals (Pickles et al. 2017).

70 The past two decades have seen extensive but inconclusive research on these hypotheses  
71 and how they relate to empirical measurements of CMN structure and function. There is a lack of  
72 alignment between theory and empirical observations. On the one hand, economic analogies  
73 suggest that the reciprocally regulated exchange of resources between plants and fungi in CMNs  
74 should favor the most beneficial cooperative partnerships (Kiers et al. 2011, Fellbaum et al.  
75 2014). On the other hand, reciprocal transfer is only found in a subset of symbionts under  
76 specific conditions, while amplified competition in CMNs is a more common observation  
77 (Walder and van der Heijden 2015, Weremijewicz et al. 2016). At the core of this controversy is  
78 whether CMNs actively support fungal growth at the expense of plant resource demands (i.e., a  
79 fungi-centric view) or function as passive channels through which plants regulate resource fluxes  
80 (i.e., a plant-centric view). If plant-centric, we expect to find that the structure and functioning of  
81 CMNs give rise to consistent spatiotemporal patterns of resource allocation akin to those  
82 predicted by the kinship hypothesis. If fungi-centric, we expect to find that spatiotemporal  
83 patterns of resource allocation reflect the composition and functioning of the fungal community  
84 regardless of the connecting plant nodes in CMNs. Data exist to support both opposing views  
85 (see Silva and Lambers 2021, Figueiredo et al. 2021); therefore, we posit that CMNs are neither  
86 plant- nor fungi-centric. Instead, perhaps more than gregarious, AM fungi are “agnostic” with  
87 respect to plant species composition and relatedness, and yet affected by major plant functional  
88 traits that are known to influence resource use and allocation. This new hypothesis implies that  
89 that the rates and direction of resource transfer in CMNs are ultimately a reflection of plant-fungi  
90 interactions manifested, for example, in spatiotemporal patterns of resource allocation driven by  
91 sink-source strength gradients.

92 To test the “agnostic fungi” hypothesis, we investigated how interactions among general  
93 biophysical and biogeochemical processes operating at the soil-plant-atmosphere interface could  
94 explain resource transfer in CMNs better than previous plant- or fungi-centric analogies. We

95 studied how soil resource-use efficiency and plant traits that regulate physiological performance  
96 affect the transfer of carbon and nitrogen in paired experiments where we also sequenced strain-  
97 level variation in root fungal DNA, plant community structure, and plant traits to test the effects  
98 of relatedness in resource transfer. Our experimental setting includes restored prairie and pasture  
99 experimental sites under ambient conditions and rain exclusion shelters, designed to affect soil  
100 water and nutrient mass flow, replicated at three different sites across a 520 km latitudinal  
101 gradient. Due to the latitudinal and natural climatic difference in communities across sites, not all  
102 species were present at all sites (Table S1); however, all “donor” species and all “receiver”  
103 functional groups were present at all sites. This allowed us to draw general inferences about the  
104 structure and function of arbuscular CMNs in temperate grasslands under a broad range of  
105 ecological and environmental conditions. The plants included in these interactions also affect  
106 CMN composition and function. For example, Davison et al. (2020) found plant growth form  
107 altered AM fungal community and functional diversity. Plant total biomass can also increase  
108 nitrogen received through a CMN, an effect that may be compounded by whether plants are  
109 woody or less dense grasses (He et al. 2019). This could be explained by larger or denser plants  
110 providing more carbon. Both plants and fungi have economic spectra characterized by fast or  
111 slow traits and nutrient strategies which together form an interacting continuum potentially  
112 driven by N availability (Ward et al. 2022). It is unclear to what extent plant or fungi  
113 characteristics drive these plant-fungal interactions. Therefore, we designed an experiment to  
114 quantify how plant-fungal interactions influence the structure and functioning of CMNs across  
115 broad environmental gradients and resource constraints.

116

## 117 **Methods**

118 We conducted our experiment at three sites situated on a 520 km latitudinal transect that  
119 spans three Mediterranean climates: cool, moist (northern site; Tenino, WA) to warm, moist  
120 (central site; Eugene, OR) to warm, dry (southern site; Selma, OR). Each circular plot was 3 m in  
121 diameter. Half of our plots were restored prairie systems (n = 10 per site) while the other half of  
122 the plots were the existing introduced pasture grass community prior to restoration (n = 10 per  
123 site). Restored prairie plots were mowed, raked, received herbicide, and seeded in 2014-2015,  
124 followed by seeding in fall 2015, 2016, and 2017 (Reed et al. 2019). We erected rainout shelters

125 that excluded 40% of the rainfall on half the plots at each site (n = 10 rain exclusion, 10 control  
126 per site; Fig. 1).

127 All plants in our system have the potential to form associations with AM fungi (Table S1)  
128 (Dickie et al. 2013, Chaudhary et al. 2016, Soudzilovskaia et al. 2020). Previous work  
129 demonstrated that the rainout shelters had minimal effects on aboveground community structure  
130 or function (Dawson et al. 2022). We labeled perennial plants central to each plot (hereafter,  
131 ‘donors’) and monitored leaf  $^{15}\text{N}$  and  $^{13}\text{C}$  for the surrounding plants (‘receivers’) for up to 21  
132 days. In addition, we sampled roots and soils at 21 days post-labelling. We characterized AM  
133 fungal DNA isolated from the root samples, as well as stable isotopes in all leaf and root  
134 samples. Our experimental design was nested in a multi-year experiment where in situ data  
135 loggers were used to continuously measure variables in all the manipulated plots. We calculated  
136 soil matric potentials to account for soil differences between sites (Saxton and Rawls 2006). Rain  
137 exclusion only changed soil temperature at the northern site and soil matric potential at the  
138 central site (Dawson et al. 2022).

139 This network of experimental sites was established since 2010 and has been extensively  
140 studied since then (Reed et al. 2019, 2021a, 2021b, 2021c, 2022, Peterson et al. 2020) including  
141 work on mycorrhizal fungi (Vandegrift et al. 2015, Wilson et al. 2016). Treatment had marginal  
142 effects on the soil water potential, which should also affect nutrient uptake through mass flow.  
143 Pasture plots were dominated by one to a few species of introduced perennial grasses which we  
144 targeted as donors in these plots. We used different species of perennial grass at each site. For  
145 restored prairie plots, we targeted the native perennial forb *Sidalcea malviflora ssp. virgata*  
146 common to ambient and drought treatments at all sites, and that has shown divergent changes in  
147 productivity in response to a warming-induced decline in mycorrhizal colonization attributed to  
148 that treatment's drying effect (Wilson et al. 2016). Despite those differences, we did not find  
149 significant changes in the average plant community composition or productivity under rain  
150 exclusion, which also did not affect morphological and functional traits (e.g., specific leaf area,  
151 iWUE, and C:N ratios) of the functional groups we selected for this experiment (Reed et al.  
152 2021c, Dawson et al. 2022).

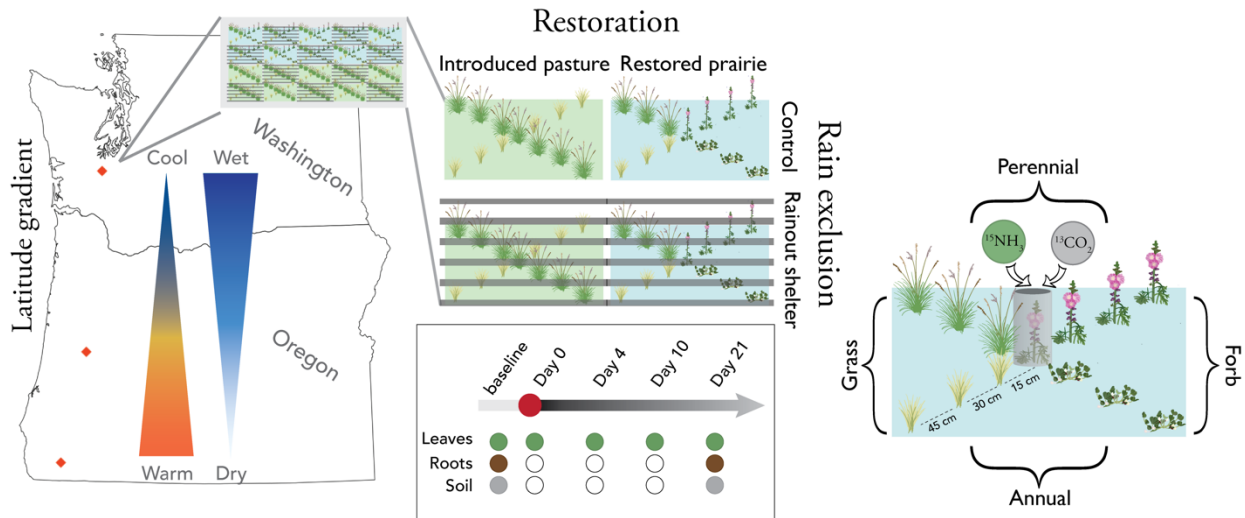

153

154 **Figure 1. Schema of experimental set up, sampling, and effects of rainout shelters.**

155

### 156 **Isotopic labelling**

157

158

159

160

161

162

163

164

165

166

167

168

169

170

171

172

173

174

175

At each site, we selected a healthy perennial forb (*Sidalcea malviflora* ssp. *virgata* in restored prairie plots [except in one plot where we used *Eriophyllum lanatum* due to a lack of *S. malviflora* ssp. *virgata*]), or a grass (*Alopecurus pratensis*, *Schedonorus arundinaceus*, or *Agrostis capillaris*) in pasture plots at the center of each plot to receive the isotopic labels. On sunny days between 11AM and 3PM, we applied isotopically enriched carbon ( $^{13}\text{C}$ ) and nitrogen ( $^{15}\text{N}$ ) as a pulse of carbon dioxide ( $\text{CO}_2$ ) and ammonia ( $\text{NH}_3$ ) to the leaves of target “donor” species common across experimental sites. We performed the labeling experiment using custom-made field-deployable clear chambers with internal fans built to allow gas mixing and fast in situ assimilation of isotopic labels, following established protocols developed in previous isotopically labeling studies (Silva et al. 2015, e.g., Earles et al. 2016, Sperling et al. 2017). We covered the donor plant with a clear plastic cylinder and injected gas in sequence at 20-minute intervals. For  $^{13}\text{CO}_2$ , we made three injections of 2 mL pure  $\text{CO}_2$  (enriched at 98 atm %  $^{13}\text{C}$ ) to double the amount of  $\text{CO}_2$  in the chamber each time. For  $\text{NH}_3$ , we made two injections of 10 mL pure  $\text{NH}_3$  (98 atm%  $^{15}\text{N}$ ). The dates of application were based on peak greenness calculated as Normalized Different Vegetation Index (NDVI) at each site (see Reed et al. 2019 for details). We sampled leaves from each donor plant immediately after labeling (time point 0) as well as from all plants approximately 4 days (time point 1), 10 days (time point 2), and 21 days (time point 3) post-labelling as logistics permitted (Fig. 1, Table S2). We also collected leaves at time points 1, 2, and 3 from up to twelve plants in each plot representing three replicates of factorial grass/forb

176 structural groups and annual/perennial life history strategies (Table S1). The number of plants  
177 and represented groups depended on which plants were growing in each plot. For example,  
178 pasture plots were limited to only grasses and the northern pasture plots had only perennial  
179 grasses.

180 By applying enriched gases only to the aerial portions of established perennial donor  
181 plants, we introduced the isotopic tracer to both the plant and mycorrhizal fungal tissues without  
182 exposing the soil to the tracers. At the end of the experiment, we harvested entire plants and  
183 surrounding rhizospheres at time point 3 and kept them in cool conditions until processing. We  
184 separated the roots and rhizospheres, and collected roots from each plant, selecting  
185 approximately ten ~3 cm fine root fragments per sample (i.e., third order or finer, where  
186 available) for DNA extraction and identification. All roots and rhizosphere soils were stored at -  
187 80° C until processing.

188

### 189 **Baseline and Resource Transfer Calculations**

190 Before isotopic labeling, we collected soil, leaves, and roots from each site. We collected  
191 soils in late spring and early summer 2019 to 20 cm depth in each plot. From these soil samples,  
192 we removed root fragments that represented the typical roots seen in each plot. We collected  
193 leaves for each species in each plot; however, these leaves were contaminated with <sup>15</sup>N during  
194 transport. To replace contaminated samples, we separately sampled leaves from biomass  
195 samplings collected in late spring and early summer 2019, ensuring that annual and perennial  
196 grasses and forbs were represented at each site.

197 We oven-dried all samples at 65° C to constant mass and encapsulated them for stable  
198 isotope analysis. All stable isotope analysis was done at UC Davis Stable Isotope Facilities using  
199 an Elementar Vario EL Cube or Micro Cube elemental analyzer (Elementar Analysensysteme  
200 GmbH, Hanau, Germany) interfaced to a PDZ Europa 20-20 isotope ratio mass spectrometer  
201 (Sercon Ltd., Cheshire, UK). We calculated the amount of carbon and nitrogen in each plant  
202 compartment (leaves and roots) using standard label recovery equations (Silva et al 2015), using  
203 baseline values measured before application of the labelled gases to capture background  
204 variations in isotopic composition of unenriched leaves, roots, and soil samples.

205 At each relevant point in space and time, we calculated % nitrogen and % carbon derived from  
206 label (%NDFL and %CDFL, respectively) as follows (Kramer et al. 2002, He et al. 2006, Silva  
207 2015).

208 **Equation 1**

---

209 Baseline values were calculated from the site- and annual/perennial-specific values for each plant  
210 material. Site-specific baseline soil and root isotope ratios represent the whole community  
211 because of interconnected rhizospheres where it was not possible to identify specific species.  
212 In all cases, baseline values fell within the expected range for our region (Fig. 2). We calculated  
213 intrinsic water-use efficiency following Dawson et al. (2022) using the baseline  $^{13}\text{C}$  values from  
214 the original samples because the contamination only occurred with  $^{15}\text{N}$ .

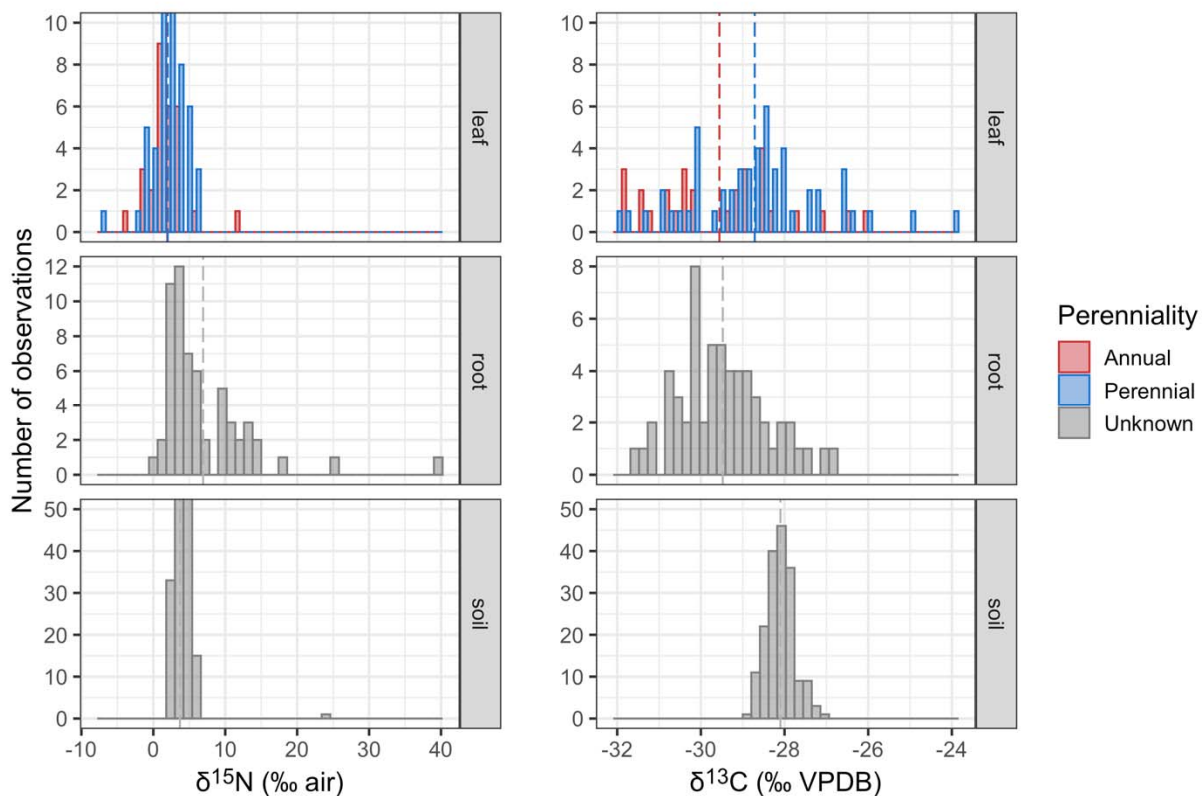

215  
216 **Figure 2. Natural abundance of stable isotopes in leaves, roots, and soil before labelling.**

217 Dashed lines indicate mean value.

218



219 To better understand post-labelling soil enrichment, we selected a subset of rhizosphere  
220 soils that represented six donor plants at each site divided equally between restored prairie and  
221 pasture plots, and selected the three most highly <sup>15</sup>N-enriched interspecific receivers in each plot.  
222 In addition, we sampled the three most highly enriched interspecific receivers at each site and  
223 restored prairie-introduced pasture combination (if they had not been sampled previously).  
224 Because pasture plots were sometimes monodominant grasses, we sampled the top three  
225 enriched intraspecific receivers at each site and treatment. In total, this came to 48 post-labelling  
226 soil samples in 29 plots.

227

### 228 **Fungal analysis**

229 We extracted DNA from roots of 450 plants harvested at time point 3 (21 days post-label)  
230 using Qiagen DNeasy Powersoil HTP kits (Qiagen, Hilden, Germany). We only analyzed DNA  
231 from roots, not from the soils collected from each plant's rhizosphere. We characterized each  
232 sample's AM fungal composition with a two-step PCR protocol that amplified a ~550bp  
233 fragment of the SSU rRNA gene (the most well-supported region for AM fungal taxonomic  
234 resolution (Dumbrell et al. 2011)). We used WANDA (5'- CAGCCGCGGTAATTCCAGCT- 3')  
235 and AML2 (5'- GAACCCAAACACTTTGGTTTCC-3') primers (Lee et al. 2008, Langmead and  
236 Salzberg 2012). We used primers with unique indices so we could multiplex several projects on a  
237 single run. We quantified successful PCR amplicons with the Quant-iT PicoGreen dsDNA Assay  
238 Kit (Invitrogen, Waltham, MA, USA) on a SpectraMax M5E Microplate Reader (Molecular  
239 Devices, San Jose, CA, USA) before purifying with QIAquick PCR Purification kits (Qiagen).  
240 We sequenced the purified pools on the Illumina MiSeq platform (paired-end 300bp, Illumina  
241 Inc., San Diego, CA, USA) at the University of Oregon Genomics and Cell Characterization  
242 Core Facility (Eugene, OR, USA). We used a custom, in-house bioinformatics pipeline to  
243 demultiplex reads and filter out duplicate reads generated by PCR duplication using unique  
244 molecular identifiers (UMIs) inserted during PCR processing.

245 We assigned amplicon sequence variants (ASVs) using the dada2 pipeline with standard  
246 quality filtering and denoising parameters (Callahan et al. 2016). The dada2 pipeline maintains  
247 strain-level diversity at the scale of individual sequence variants rather than clustering sequences  
248 into OTUs. This fine-scale measure of fungal sequence diversity was particularly important for  
249 our analyses to maintain the greatest chance of detecting a single AM fungal 'individual' in

250 multiple plant root samples. Taxonomy was assigned to ASVs using the MaarjAM database  
251 (2019 release) (Öpik et al. 2010). We used a Bayesian mixture model in the DESeq2 package  
252 (Love et al. 2014) to scale ASV counts within and across samples to avoid artificial taxon  
253 abundance biases (Anders and Huber 2010).

254

## 255 **Data analysis**

256 We performed all analyses in R ver. 4.0.4 (R Core team 2015). We removed one plant  
257 with <sup>15</sup>N outlier data. We also removed five plants with mislabeled samples. To meet statistical  
258 assumptions, we only included data from plants with successful root fungal DNA extraction. In  
259 total, we analyzed data from 389 unique plants: 53 donors and 336 receivers.

260 We tested the relationship between NDFL and plant traits and site conditions with a  
261 mixed-effect ANOVA (Table 1). We constructed a phyloseq object using the ASV table with  
262 normalized counts (McMurdie and Holmes 2013), and used iGraph, metagMisc, and RCy3  
263 (Nepusz and Csardi 2006, Mikryukov 2017, Gustavsen et al. 2019) to create networks for each  
264 plot. In each network, nodes represented individual plants and edges between nodes represent  
265 plants sharing at least one fungal DNA sequence variant. The weighted edges are based on how  
266 many fungal ASVs were shared among plants. We calculated degrees of connectivity with  
267 tidygraph (Petersen 2022) to examine how many plants each individual plant was ‘connected’ to  
268 (by means of shared fungal ASVs) in each plot (Fig. 3). We also calculated whether each  
269 receiver plant shared fungal ASVs with the central donor plant in each plot. We visualized  
270 individual plot networks in CytoScape. We visualized shifts in AM fungal community  
271 composition using non-metric multi-dimensional scaling (NMDS) in the vegan package,  
272 demonstrating the AM fungal community similarity across plants (Oksanen et al. 2022).

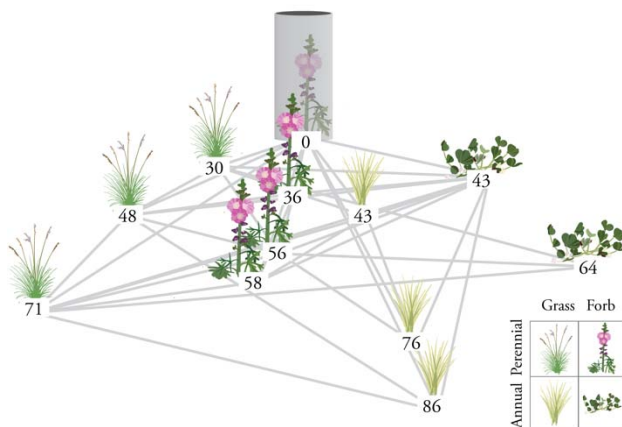

273

274 **Figure 3. Example of how networks were constructed for each plot.** The grey cylinder  
275 indicates the donor plant for the plot. Numbers beneath the receivers are the distance (in  
276 centimeters) from the donor. Degrees were calculated as how many plants each individual plant  
277 was connected to by shared fungal ASVs; for example, the perennial grass at 71 cm has 7  
278 degrees.

279

## 280 **Results**

281 Assimilation of isotopic tracers was similar between labeled “donor” plants with no  
282 significant differences on average between sites or experimental treatments within sites,  
283 including rainfall exclusion or restored status (Fig. S1). At all sites, foliar assimilation of  $^{15}\text{N}$  and  
284  $^{13}\text{C}$  by donor plants led to enrichment levels ranging from approximately 5-fold to one order of  
285 magnitude higher than baselines, with only a few that were less than 2-fold from baseline. Foliar  
286 enrichment levels decreased consistently at all sites and treatments over the 21 day sampling  
287 period, suggesting translocation within plants and interspecific transfer between species. We  
288 found significant spatial and temporal differences in foliar and root isotope ratios in donors and  
289 receivers resulting from interspecific transfer of carbon and nitrogen (Fig. 4; Table 1). Receiver  
290 foliar enrichment levels did not correlate with donor foliar enrichment levels within the same  
291 plot (Fig. S2).

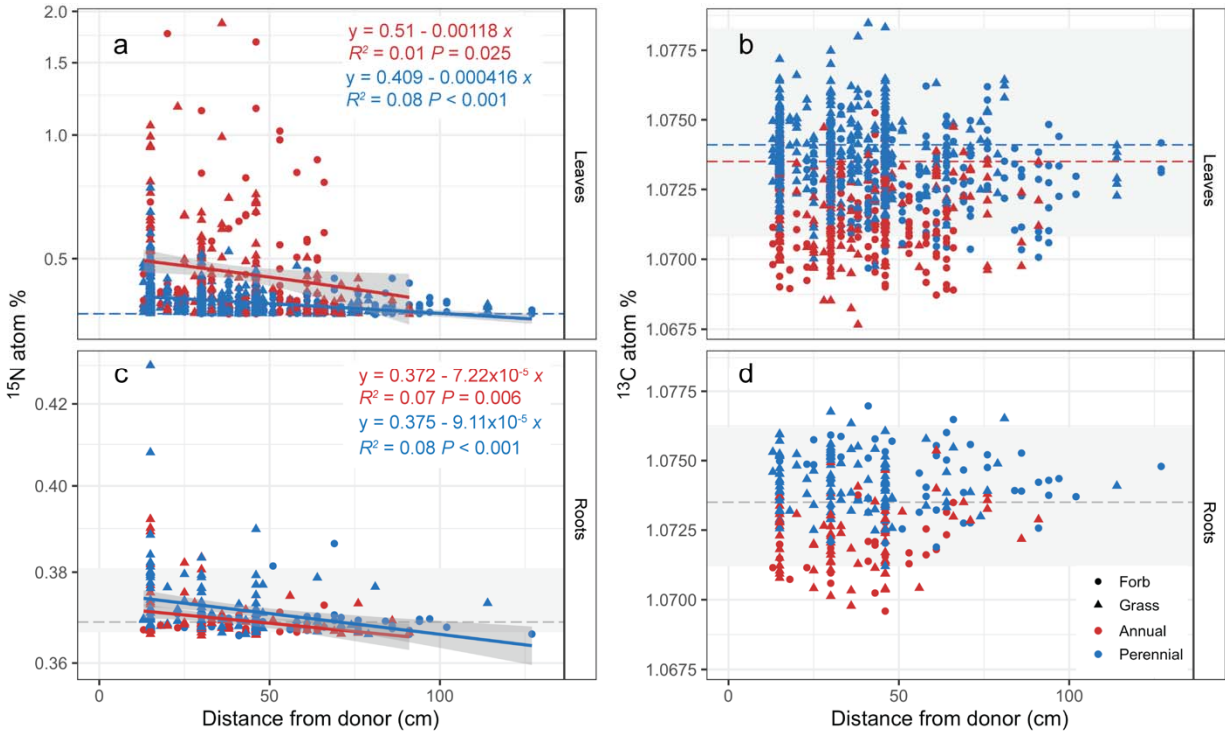

292

293 **Figure 4. Decreased receiver enrichment with distance from donor in leaves and roots.**

294 Dashed lines indicate natural abundance means; grey boxes indicate range of natural abundance

295 variation shown in Fig. 2. There is no systematic enrichment of  $^{13}\text{C}$ ; however, there is high  $^{15}\text{N}$

296 enrichment in leaves. Y-axes are log<sub>10</sub> scale. Note that the y-axis scales are different between  $^{15}\text{N}$

297 leaves and  $^{15}\text{N}$  roots. Inset box shows distribution of  $^{15}\text{N}$  atm% for enriched (greater than natural

298 abundance) annual and perennial leaves and roots.

299 **Table 1. ANOVA results effects on nitrogen derived from label (NDFL)**

|                                                | $\chi^2$ | P-value          |
|------------------------------------------------|----------|------------------|
| <i>Fixed effects</i>                           |          |                  |
| <b>Annual/perennial</b>                        | 37.895   | <b>&lt;0.001</b> |
| <b>Grass/forb</b>                              | 19.075   | <b>&lt;0.001</b> |
| iWUE                                           | 0.150    | 0.698            |
| Degree of connectivity                         | 0.847    | 0.357            |
| <b>C:N</b>                                     | 77.547   | <b>&lt;0.001</b> |
| Site                                           | 4.913    | 0.086            |
| Drought treatment                              | 0.189    | 0.664            |
| Restoration treatment                          | 2.398    | 0.121            |
| <b>Distance from donor</b>                     | 15.423   | <b>&lt;0.001</b> |
| <b>Time from labelling</b>                     | 162.582  | <b>&lt;0.001</b> |
| <b>Annual/perennial:Grass/forb interaction</b> | 8.670    | <b>0.003</b>     |
| <i>Random effect</i>                           |          |                  |
| <b>Plot</b>                                    |          | <b>&lt;0.001</b> |

300

301 Allocation of  $^{13}\text{C}$  and  $^{15}\text{N}$  tracers to roots and subsequent transfer to “receiver” species  
302 did not follow expected patterns (e.g., despite donors being perennial, annual receivers were  
303 more enriched, indicating that relatedness did not drive the transfer, Fig. 4, Table 1) but varied  
304 significantly between functional groups due to their intrinsic differences in physiological traits  
305 and tissue stoichiometry (Table 1). We selected 18 representative annual/perennial and grass/forb  
306 species of receiver plants, which revealed significant differences between functional groups for  
307 NDFL (Fig. 5) but no detectable CDFL relative to baseline (Fig. 4).

308 Rain exclusion treatment, restoration treatment, and site did not affect interspecific  
309 transfer of nitrogen (Fig S3; ANOVA,  $P > 0.05$ , Table 1), and carbon was not enriched enough to

310 test transfer (Fig. 4). We did, however, observe significant differences in nitrogen transfer by  
 311 functional group (Table 1), mirroring intrinsic differences in tissue stoichiometry and iWUE  
 312 (Fig. 5), despite no significant enrichment in soils collected from the rhizosphere of those same  
 313 plants (Fig. S4). C:N affected NDFL (Table 1), but NDFL did not correlate with C:N or iWUE  
 314 (Fig. 5). We did detect a low level of soil enrichment in 4 out of 23 donor soil samples (ranging  
 315 from 0.382 to 0.479 atm% <sup>15</sup>N).

316 Annuals had greater <sup>15</sup>N foliar enrichment compared to perennials (ANOVA, P < 0.001,  
 317 Tables 1 and 2). Foliar enrichment decreased over both time and space (ANOVA P < 0.001; Fig.  
 318 4, Fig. S1). On average, annuals had a lower leaf nitrogen content and higher C:N than  
 319 perennials (Table 2, Fig. 5). Forbs had higher NDFL than grasses (ANOVA, P < 0.001, Table 1)  
 320 as well as a lower C:N. There was a significant interaction between annual/perennial and  
 321 grass/forb form (ANOVA, P = 0.003, Table 1).

322

323 **Table 2. Nitrogen derived from label (NDFL) and leaf tissue nitrogen (% N) four days after**  
 324 **labeling.**

|           |       | <i>n</i> | NDFL        |   |           |            |            | % N         |   |           |            |            |
|-----------|-------|----------|-------------|---|-----------|------------|------------|-------------|---|-----------|------------|------------|
|           |       |          | <i>Mean</i> | ± | <i>SD</i> | <i>Min</i> | <i>Max</i> | <i>Mean</i> | ± | <i>SD</i> | <i>Min</i> | <i>Max</i> |
| Annual    | Forb  | 54       | 0.206       | ± | 0.281     | 0.003      | 1.427      | 1.731       | ± | 0.849     | 0.528      | 4.081      |
|           | Grass | 93       | 0.130       | ± | 0.199     | 0.001      | 1.534      | 1.233       | ± | 0.919     | 0.359      | 8.004      |
| Perennial | Forb  | 67       | 0.033       | ± | 0.026     | 0.006      | 0.144      | 2.521       | ± | 0.753     | 1.079      | 4.136      |
|           | Grass | 148      | 0.040       | ± | 0.028     | 0.005      | 0.147      | 1.600       | ± | 0.529     | 0.614      | 2.938      |

325

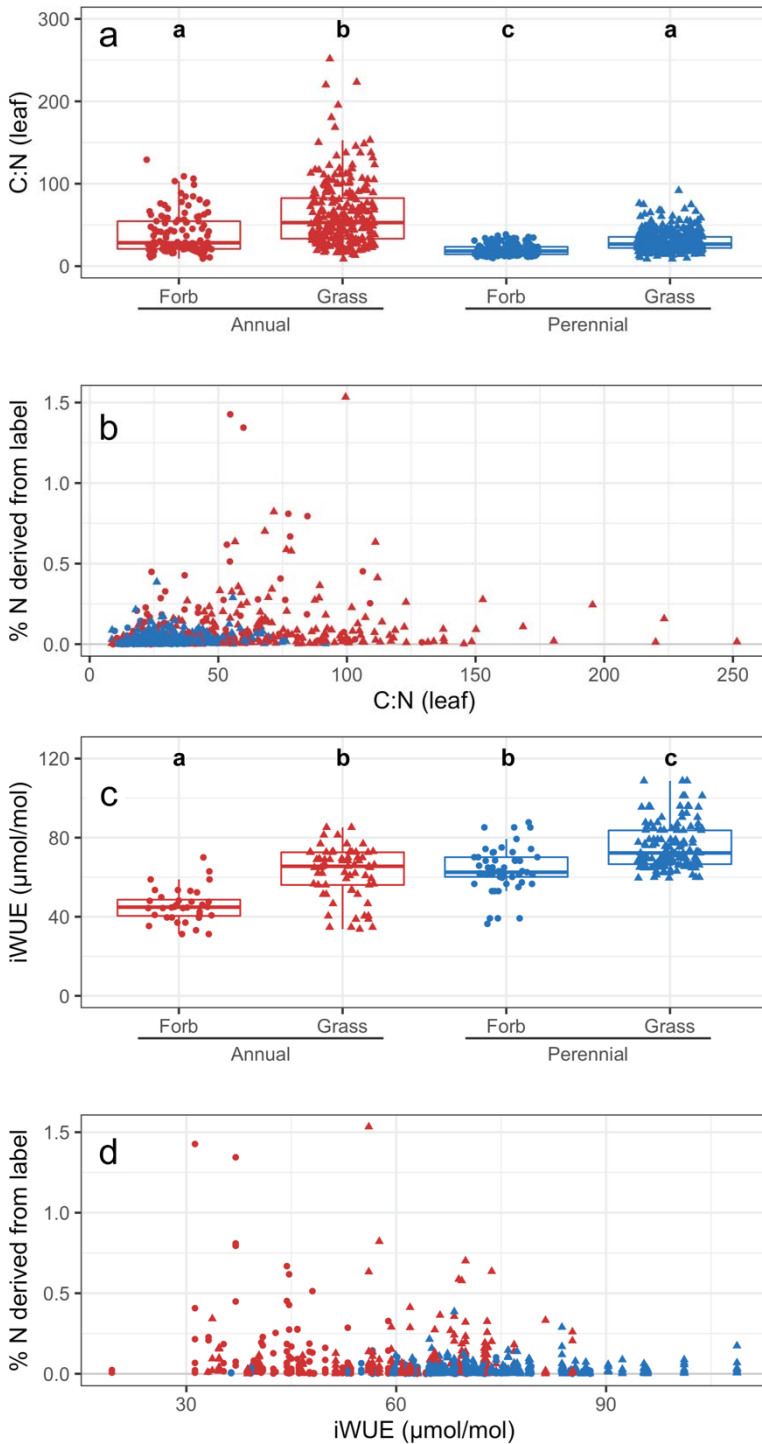

326

327 **Figure 5. Stoichiometric and functional traits compared to nitrogen derived from transfer.**

328 A) Leaf C:N by annual/perennial. B) Percent  $^{15}\text{N}$  derived from label (DFL) compared to C:N in

329 leaves. C) iWUE by annual/perennial as measured before labelling. D) Percent  $^{15}\text{N}$  DFL

330 compared to iWUE in leaves at all time points.

331

332 Our analysis of fungal community composition shows a high degree of connectivity  
333 between plants of different species but no obvious pattern of connectedness that could explain  
334 preferential nutrient transfer by plant functional groups. Overall, we inferred that plants in all  
335 experimental plots and sites were highly ‘connected’ (as inferred from shared fungal ASVs)  
336 because we found that  $97.25\% \pm 8.01$  (SD) of all plants roots within each experimental plot  
337 shared at least one fungal DNA sequence variant (ASV) with another plant of the same plot.  
338 Fungal community composition was similar across plant functional groups (Fig. 6). Annual  
339 plants shared fungi with more plants in the same plot ( $4.74$  plants  $\pm 2.62$  SD) compared to  
340 perennials ( $4.04$  plants  $\pm 2.49$  SD ; t-test,  $P = 0.019$ ; Table S3), but degrees of connectivity did  
341 not predict nitrogen transfer (Table 1). Seventy-three percent of plants were colonized by four or  
342 fewer fungi and shared fungi with five or fewer other plants in the plot, making it difficult to  
343 determine if strength of connectivity altered nitrogen transfer (Fig. S5).

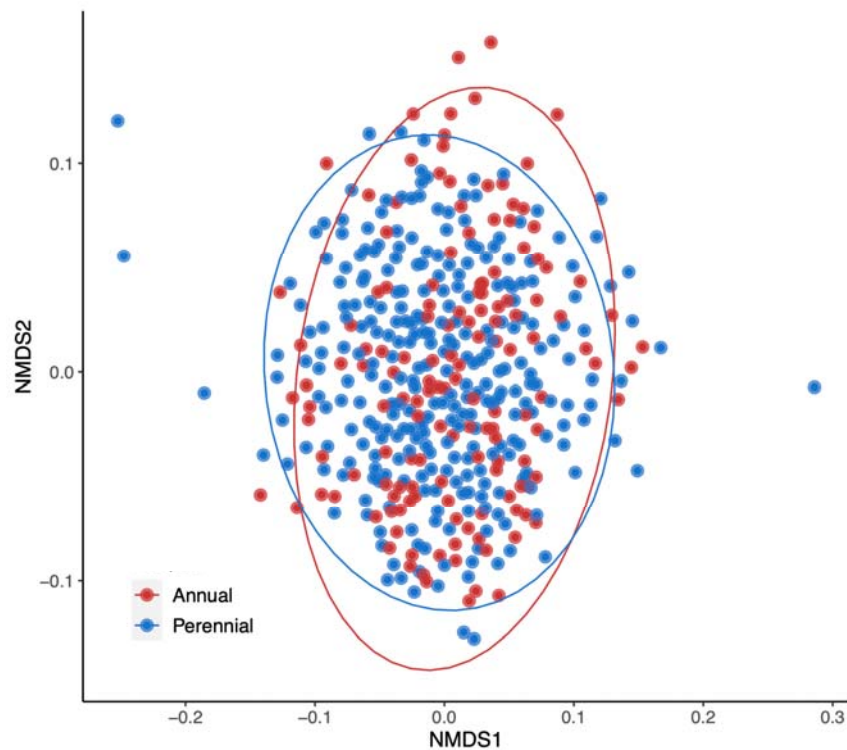

344

345 **Figure 6. NMDS of fungal communities.** Each point is an individual plant ordinated by its  
346 fungal community.

347

348 **Discussion**



349 In our extensively replicated spatiotemporal isotopic tracer experiment, the assimilation  
350 and allocation of limiting resources in CMNs was neither plant- nor fungi-centric. Our data show  
351 that AM fungi are “agnostic” with respect to plant species composition and relatedness, and that  
352 the transfer of nitrogen (the most important nutrient limiting plant growth in our system) is  
353 regulated by major functional traits that are known to influence resource use and allocation in  
354 plant communities. The rates and direction of resource transfer in CMNs, inferred from pulse  
355 labeling and recovery of  $^{15}\text{N}$  in leaves and rhizospheres, can be predicted from plant traits and  
356 distance from donor species (Fig 1). Across all sites and treatments, we observed a stronger sink  
357 for  $^{15}\text{N}$  in annual plants close to the source donor, indicating preferential transfer of limiting  
358 resources to that functional group of plants. This observation is contrary to the expectation of the  
359 kinship hypothesis that preferential transfer would be expected to occur among perennial donors  
360 and receivers. Although plants shared a high proportion of fungal ASVs in their roots (Fig. 6),  
361 connectivity did not predict  $^{15}\text{N}$  transfer (Table 1), and thus we found no evidence for a fungi-  
362 centric hypothesis based on which all connected plants would have been expected to be equally  
363 enriched in  $^{15}\text{N}$ . In summary, our data suggests that the rates and direction of resource transfer in  
364 CMNs are ultimately a reflection of plant-fungi interactions manifested in spatiotemporal  
365 patterns of resource allocation driven by plant functional traits and sink-source strength  
366 gradients.

367 We did not find  $^{13}\text{C}$  enrichment in most samples, above- or belowground, and both  $^{15}\text{N}$   
368 and  $^{13}\text{C}$  signatures of receiver plants were independent of donor or soil enrichment levels. We  
369 designed this experiment to be informed by previous hypotheses on how carbon and nitrogen  
370 transfer occurs in highly connected CMNs, where a dilution of the applied  $^{13}\text{C}$  label is to be  
371 expected given the vast amounts of carbon in the soil and plant biomass. We conducted repeated  
372 spatiotemporal sampling of isotopic enrichment levels at increasing distances from donor  
373 species, days to weeks after labelling, and in well-established communities exposed to multiple  
374 years of experimental treatments, expecting to find evidence of kinship (i.e., greatest resource  
375 transfer in related plants), driven by CMN economics (i.e.,  $^{15}\text{N}$  transfer rates coinciding with  $^{13}\text{C}$   
376 investment in root and fungal mass). Our donor plants were perennials while annuals received,  
377 on average, an order of magnitude higher enrichment. Thus, we discarded kinship as a possible  
378 driver of transfer in this system. We also did not find evidence of a relationship between  $^{15}\text{N}$  in  
379 leaves and  $^{13}\text{C}$  in roots. Therefore, here too our data do not support either hypothesis and instead

380 suggest AM fungi are “agnostic” with respect to plant species partnerships, forming CMNs  
381 where the rates and direction of resource transfer ultimately reflects a sink-source strength in  
382 ecophysiological performance and stoichiometric gradients.

383 Our dual-isotope ( $^{13}\text{C}$  and  $^{15}\text{N}$ ) labelling approach was deliberately imposed upon an  
384 existing climate experiment to investigate trade between carbon and nitrogen from assimilation  
385 to translocation among plant compartments and fungal partners. Our results are consistent with  
386 earlier experiments performed in greenhouse experiments under low stress (e.g., temperature  
387 controlled and irrigated twice daily) (Silva et al. 2015). However, post-assimilation translocation  
388 did not support previous data. Plants acquire  $\text{CO}_2$  and  $\text{NH}_3$  from the atmosphere and release  
389 those same gases into their surroundings, exhibiting a foliar compensation point at which the  
390 evolution of gases is equal to assimilation (Farquhar et al. 1980). This compensation point  
391 depends on the partial pressure of  $\text{CO}_2$  or  $\text{NH}_3$  in the mesophyll, and therefore on its partial  
392 pressure in the atmosphere, with an increase in leaf uptake expected for both gases as their  
393 concentration rises. Our pulse experiment worked for both gases, causing lasting enrichment  
394 levels in the leaves of donor species and, over time, in the leaves of receiver individuals of other  
395 species, suggesting translocation and transfer (Fig. 4 and S1). This result represents an integrated  
396 measure of the total foliar assimilation of  $\text{NH}_3$  and  $\text{CO}_2$  after a single pulse of isotopically  
397 enriched gases.

398 Nitrogen enrichment levels remained high in leaves and many roots at the end of the  
399 experiment, allowing us to measure NDFL across the community and infer the main drivers of N  
400 transfer. However, carbon enrichment levels faded before plants were harvested approximately  
401 21 days post-labelling, either due to losses via respiration or redistribution in CMNs where it  
402 became undetectable in all but a few cases. After controlling for variation in assimilation rates,  
403 we found that annual plants received greater  $^{15}\text{N}$  enrichment than perennial plants. Plants closest  
404 to the donor were most enriched, and  $^{15}\text{N}$  enrichment decreased over time (Fig. 4). Plant  
405 connectivity through a possible CMN did not predict  $^{15}\text{N}$  enrichment. We did not detect  $^{13}\text{C}$   
406 enrichment in roots, shoots, or soils. Annuals had lower total nitrogen content than perennials,  
407 mirroring intrinsic differences in stoichiometry and water-use efficiency (although with no  
408 significant correlation found; Fig. 5), indicating that kinship did not drive this transfer as all  
409 donor plants were perennials. Although the rainout shelters had limited effect, there were major

410 differences across the latitudinal gradient represented by the sites in temperature and soil  
411 moisture availability (some HOPS ref.); however, neither treatment nor site affected our results.

412 The major drivers of differences in allocation of  $^{13}\text{C}$  and  $^{15}\text{N}$  to roots and subsequent  
413 transfer to “receiver” species were the intrinsic difference in physiological traits and tissue  
414 stoichiometry between structural groups (annual/perennial or grass/forb; Table 1). This result  
415 points to a simple mechanistic explanation to reconcile long-standing questions regarding  
416 mutualism and hierarchical transfer of resources between plants via mycorrhizal networks, an  
417 explanation that can lead to general predictions of preferential flow of limiting resources in other  
418 ecosystems. For example, previous studies in northern California under environmental conditions  
419 similar to those found in our southernmost experimental site showed rapid (days to weeks)  
420 transfer of  $^{15}\text{N}$  applied to the leaves of ectomycorrhizal pines to surrounding annual AM plant  
421 receivers (He et al. 2006). Those results were interpreted as evidence for agnostic CMNs because  
422 “direct fungal connections are not necessary for N transfer among plants” and “leaves of the  
423 annual plants had greater  $^{15}\text{N}$  derived from source (NDFS) and were more enriched ( $^{15}\text{N}$  at %  
424 excess and  $\delta^{15}\text{N}$  values) than perennial receivers, irrespective of the mycorrhizal type.”  
425 Similarly, as proposed by He et al. (2006), our observation of agnostic  $^{15}\text{N}$  transfer from donor to  
426 receivers suggests that annual plants, with their extensive root systems, were a strong sink for N  
427 which could be explained by stoichiometric gradients that affect root exudation and recapture of  
428 N-containing materials from rhizodeposition. Our data corroborate rapid agnostic transfer among  
429 AM plants, with no detectable enrichment in root or soil  $^{13}\text{C}$  near roots 21 days post-labelling,  
430 but do not allow us to determine which mechanism is responsible for the  $^{15}\text{N}$  transfers.

431 We inferred a high connectivity between plants within each given treatment and site  
432 given the highly similar fungal composition in the root systems of both perennial and annual  
433 plants (Fig. 6). (Given the constraints of ASV-identified data, we did this analysis on a strain-  
434 level scale and we acknowledge there is a chance that separate spores of the same ASV may  
435 have separately infected plants within the same plot. However, we are reasonably confident in  
436 our use of fungal ASVs as a proxy for connectivity given the strong overlap in our community  
437 and because individuals of one ASV can anastomose in the soil (Mikkelsen et al. 2008).) This  
438 overlap could explain the lack of support for the kinship hypothesis in our dataset and offers  
439 further support for stoichiometric gradients as the fundamental control of terms of trade in  
440 CMNs. The marketplace hypothesis proposes that host plants provide the mycorrhizal fungus

441 with carbon in the form of simple sugars. The rate which fungi take up these sugars is controlled  
442 by their affinity to the host. Different C sources from a host trigger changes in fungal  
443 monosaccharide transporter gene expression, causing fungi to increase N uptake from the soil  
444 (Fellbaum et al. 2012). However, host and fungus-specific gene expression differences would be  
445 weak in our study sites because our DNA results demonstrate that our plants were highly  
446 connected by shared arbuscular mycorrhizal (AM) fungal ASVs. In our case, the <sup>15</sup>N we applied  
447 to leaves could have mineralized, been recycled at the soil/fungal interface, and converted into  
448 basic organic compounds such as amino acids (e.g., via glutamine synthetase or  
449 argininosuccinate synthase) which act as charge balance in the catabolic arm of the urea cycle.  
450 The fact that we supplied a carbon source (acetate) independent from the C supply of the host  
451 could have reduced N transport in the AM symbiosis. Apoplastic transport would then explain  
452 how some of the labeled C ended up in plants even though most of it is expected to go to the  
453 fungal symbionts. This mechanism also explains how N and mineral elements (e.g., P) are  
454 transferred through CMNs from plant to plant even though they are not expected to limit fungal  
455 growth (Ward et al. 2022).

456 In conclusion, we found that plant-soil stoichiometric gradients and functional traits were  
457 the strongest drivers of resource sharing in grassland CMNs. We interpret this finding as  
458 evidence of biochemical and biophysical sinks, in which nutrients are allocated to plants with the  
459 greatest need for those nutrients, either through a ‘passive’ mycorrhizal network or direct uptake  
460 from soil, or that nutrients should be allocated through water flow. Expanding on previous  
461 studies, we propose that agnostic AM fungi facilitate spatiotemporal dynamics of carbon and  
462 nitrogen through CMNs in ways that are neither plant- nor fungi-centric. That is, plants and fungi  
463 that are located closer together in space and with stronger demand for resources over time are  
464 more likely to receive larger amounts of those limiting resources.

465

## 466 **Acknowledgements**

467 The authors thank the Siskiyou Field Institute, The Nature Conservancy, and Capitol Land Trust  
468 for providing sites for this experiment, Laurel Pfeifer-Meister, Bitty Roy, Bart Johnson, Graham  
469 Bailes, Aaron Nelson, and Matthew Krna for their contributions to experimental design, Emily  
470 Scherer for her assistance with sample analysis, Bitty Roy for comments on the manuscript, and  
471 numerous others for assistance with the HOPS project. This experiment was funded by National

472 Science Foundation Macrosystems Biology grant #1340847, Plant Biotic Interactions grant  
473 #1758947, and Convergence Accelerator Pilot grant #1939511.

474

#### 475 **Data availability statement**

476 Data used in these analyses are available online at the Data Dryad repository  
477 (<https://doi.org/10.5061/dryad.7pvmcvdxt>). While this paper is under review, data can be  
478 accessed using the following unpublished link:

479 [https://datadryad.org/stash/share/bz0dQHa9xnzgOqwsF\\_3N0TSx3Oh6OWmEITExtAjyGUc](https://datadryad.org/stash/share/bz0dQHa9xnzgOqwsF_3N0TSx3Oh6OWmEITExtAjyGUc)

480

#### 481 **References**

- 482 Anders, S., and W. Huber. 2010. Differential expression analysis for sequence count data.  
483 *Genome Biology* 11:1–12.
- 484 Averill, C., J. M. Bhatnagar, M. C. Dietze, W. D. Pearse, and S. N. Kivlin. 2019. Global imprint  
485 of mycorrhizal fungi on whole-plant nutrient economics. *Proceedings of the National*  
486 *Academy of Sciences of the United States of America* 116:23163–23168.
- 487 Brundrett, M. C. 2009. Mycorrhizal associations and other means of nutrition of vascular plants:  
488 understanding the global diversity of host plants by resolving conflicting information and  
489 developing reliable means of diagnosis. *Plant and Soil* 320:37–77.
- 490 Callahan, B. J., P. J. McMurdie, M. J. Rosen, A. W. Han, A. J. A. Johnson, and S. P. Holmes.  
491 2016. DADA2: High-resolution sample inference from Illumina amplicon data. *Nature*  
492 *Methods* 2016 13:7 13:581–583.
- 493 Chaudhary, V. B., M. A. Rúa, A. Antoninka, J. D. Bever, J. Cannon, A. Craig, J. Duchicela, A.  
494 Frame, M. Gardes, C. Gehring, M. Ha, M. Hart, J. Hopkins, B. Ji, N. C. Johnson, W.  
495 Kaonongbua, J. Karst, R. T. Koide, L. J. Lamit, J. Meadow, B. G. Milligan, J. C. Moore, T.  
496 H. P. IV, B. Piculell, B. Ramsby, S. Simard, S. Shrestha, J. Umbanhowar, W. Viechtbauer,  
497 L. Walters, G. W. T. Wilson, P. C. Zee, and J. D. Hoeksema. 2016. Data Descriptor:  
498 MycoDB, a global database of plant response to mycorrhizal fungi. *Nature*:3:160028.
- 499 Davison, J., D. García de León, M. Zobel, M. Moora, C. G. Bueno, M. Barceló, M. Gerz, D.  
500 León, Y. Meng, V. D. Pillar, S. K. Sepp, N. A. Soudzilovskaia, L. Tedersoo, S. Vaessen,  
501 T. Vahter, B. Winck, and M. Öpik. 2020. Plant functional groups associate with distinct  
502 arbuscular mycorrhizal fungal communities. *New Phytologist* 226:1117–1128.
- 503 Dawson, H. R., T. M. Maxwell, P. B. Reed, S. D. Bridgham, and L. C. R. Silva. 2022. Leaf  
504 Traits Predict Water-Use Efficiency in U.S. Pacific Northwest Grasslands Under Rain  
505 Exclusion Treatment. *Journal of Geophysical Research: Biogeosciences*  
506 127:e2022JG007060.
- 507 Dickie, I. A., L. B. Martínez-García, N. Koele, G. A. Grelet, J. M. Tylianakis, D. A. Peltzer, and  
508 S. J. Richardson. 2013. Mycorrhizas and mycorrhizal fungal communities throughout  
509 ecosystem development. *Plant and Soil* 367:11–39.
- 510 Dumbrell, A. J., P. D. Ashton, N. Aziz, G. Feng, M. Nelson, C. Dytham, A. H. Fitter, and T.  
511 Helgason. 2011. Distinct seasonal assemblages of arbuscular mycorrhizal fungi revealed by  
512 massively parallel pyrosequencing. *New Phytologist* 190:794–804.

- 513 Earles, J. M., O. Sperling, L. C. R. Silva, A. J. McElrone, C. R. Brodersen, M. P. North, and M.  
514 A. Zwieniecki. 2016. Bark water uptake promotes localized hydraulic recovery in coastal  
515 redwood crown. *Plant, Cell & environment* 39:320–328.
- 516 Farquhar, G. D., P. M. Firth, R. Wetselaar, and B. Weir. 1980. On the Gaseous Exchange of  
517 Ammonia between Leaves and the Environment: Determination of the Ammonia  
518 Compensation Point. *Plant physiology* 66:710–714.
- 519 Fellbaum, C. R., E. W. Gachomo, Y. Beesetty, S. Choudhari, G. D. Strahan, P. E. Pfeffer, E. T.  
520 Kiers, and H. Bücking. 2012. Carbon availability triggers fungal nitrogen uptake and  
521 transport in arbuscular mycorrhizal symbiosis. *Proceedings of the National Academy of  
522 Sciences of the United States of America* 109:2666–2671.
- 523 Fellbaum, C. R., J. A. Mensah, A. J. Cloos, G. E. Strahan, P. E. Pfeffer, E. T. Kiers, and H.  
524 Bücking. 2014. Fungal nutrient allocation in common mycorrhizal networks is regulated by  
525 the carbon source strength of individual host plants. *New Phytologist* 203:646–656.
- 526 Figueiredo, A. F., J. Boy, and G. Guggenberger. 2021. Common Mycorrhizae Network: A  
527 Review of the Theories and Mechanisms Behind Underground Interactions. *Frontiers in  
528 Fungal Biology* 0:48.
- 529 Gustavsen, J. A., S. Pai, R. Isserlin, B. Demchak, and A. R. Pico. 2019. RCy3: Network biology  
530 using Cytoscape from within R. *F1000Research* 8:1774.
- 531 He, X., C. S. Bledsoe, R. J. Zasoski, D. Southworth, and W. R. Horwath. 2006. Rapid nitrogen  
532 transfer from ectomycorrhizal pines to adjacent ectomycorrhizal and arbuscular mycorrhizal  
533 plants in a California oak woodland. *New Phytologist* 170:143–151.
- 534 He, Y., J. H. C. Cornelissen, P. Wang, M. Dong, and J. Ou. 2019. Nitrogen transfer from one  
535 plant to another depends on plant biomass production between conspecific and  
536 heterospecific species via a common arbuscular mycorrhizal network. *Environmental  
537 Science and Pollution Research* 26:8828–8837.
- 538 van der Heijden, M. G. A., F. M. Martin, M. A. Selosse, and I. R. Sanders. 2015. Mycorrhizal  
539 ecology and evolution: the past, the present, and the future. *New Phytologist* 205:1406–  
540 1423.
- 541 Johnson, N. C., J. H. Graham, and F. A. Smith. 1997. Functioning of mycorrhizal associations  
542 along the mutualism–parasitism continuum\*. *New Phytologist* 135:575–585.
- 543 Kenrick, P., and C. Strullu-Derrien. 2014. The Origin and Early Evolution of Roots 1. *Plant  
544 Physiology*:570–580.
- 545 Kiers, E. T., M. Duhamel, Y. Beesetty, J. A. Mensah, O. Franken, E. Verbruggen, C. R.  
546 Fellbaum, G. A. Kowalchuk, M. M. Hart, A. Bago, T. M. Palmer, S. A. West, P.  
547 Vandenkoornhuyse, J. Jansa, and H. Bücking. 2011. Reciprocal rewards stabilize  
548 cooperation in the mycorrhizal symbiosis. *Science* 333:880–882.
- 549 Klironomos, J. N. 2003. Variation in plant response to native and exotic arbuscular mycorrhizal  
550 fungi. *Ecology* 84:2292–2301.
- 551 Kramer, A. W., T. A. Doane, W. R. Horwath, and C. van Kessel. 2002. Combining fertilizer and  
552 organic inputs to synchronize N supply in alternative cropping systems in California.  
553 *Agriculture, Ecosystems & Environment* 91:233–243.
- 554 Langmead, B., and S. L. Salzberg. 2012. Fast gapped-read alignment with Bowtie 2. *Nature  
555 Methods* 2012 9:4 9:357–359.
- 556 Lee, J., S. Lee, and J. P. W. Young. 2008. Improved PCR primers for the detection and  
557 identification of arbuscular mycorrhizal fungi. *FEMS Microbiology Ecology* 65:339–349.

- 558 Love, M. I., W. Huber, and S. Anders. 2014. Moderated estimation of fold change and dispersion  
559 for RNA-seq data with DESeq2. *Genome Biology* 15:1–21.
- 560 Mariotte, P., C. Meunier, D. Johnson, A. Thébault, T. Spiegelberger, and A. Buttler. 2013.  
561 Arbuscular mycorrhizal fungi reduce the differences in competitiveness between dominant  
562 and subordinate plant species. *Mycorrhiza* 23:267–277.
- 563 McMurdie, P. J., and S. Holmes. 2013. phyloseq: An R Package for Reproducible Interactive  
564 Analysis and Graphics of Microbiome Census Data. *PLOS ONE* 8:e61217.
- 565 Mikkelsen, B. L., S. Rosendahl, and I. Jakobsen. 2008. Underground resource allocation between  
566 individual networks of mycorrhizal fungi. *New Phytologist* 180:890–898.
- 567 Mikryukov, V. 2017, May 4. metagMisc.
- 568 Nepusz, T., and G. Csardi. 2006. The igraph software package for complex network research.  
569 *InterJournal*.
- 570 Oksanen, J., G. Simpson, F. Blanchet, R. Kindt, P. Legendre, P. Minchin, R. O’Hara, P.  
571 Solymos, M. Stevens, E. Szoecs, H. Wagner, M. Barbour, M. Bedward, B. Bolker, D.  
572 Borcard, G. Carvalho, M. Chirico, M. de Caceres, S. Durand, H. Evangelista, R. FitzJohn,  
573 M. Friendly, B. Furneaux, G. Hannigan, M. Hill, L. Lahti, D. McGlenn, M. Ouellette, E.  
574 Ribeiro Cunha, T. Smith, A. Stier, C. ter Braak, and J. Weedon. 2022. vegan: Community  
575 Ecology Package.
- 576 Öpik, M., A. Vanatoa, E. Vanatoa, M. Moora, J. Davison, J. M. Kalwij, Ü. Reier, and M. Zobel.  
577 2010. The online database MaarjAM reveals global and ecosystemic distribution patterns in  
578 arbuscular mycorrhizal fungi (Glomeromycota). *New Phytologist* 188:223–241.
- 579 Petersen, T. 2022. tidygraph: A Tidy API for Graph Manipulation.
- 580 Peterson, M. L., G. Bailes, L. B. Hendricks, L. Pfeifer-Meister, P. B. Reed, S. D. Bridgham, B.  
581 R. Johnson, R. Shriver, E. Waddle, H. Wroton, D. F. Doak, B. A. Roy, and W. F. Morris.  
582 2020. Latitudinal gradients in population growth do not reflect demographic responses to  
583 climate. *Ecological Applications*.
- 584 Pickles, B. J., R. Wilhelm, A. K. Asay, A. S. Hahn, S. W. Simard, and W. W. Mohn. 2017.  
585 Transfer of <sup>13</sup>C between paired Douglas-fir seedlings reveals plant kinship effects and  
586 uptake of exudates by ectomycorrhizas. *New Phytologist* 214:400–411.
- 587 R Core team. 2015. R Core Team.
- 588 Reed, P. B., H. R. Assour, A. Okotie-Oyekan, G. T. Bailes, B. R. Johnson, A. A. Nelson, L.  
589 Pfeifer-Meister, B. A. Roy, and S. D. Bridgham. 2022. Climate Effects on Prairie  
590 Productivity Partially Ameliorated by Soil Nutrients and Plant Community Responses.  
591 *Ecosystems*.
- 592 Reed, P. B., S. D. Bridgham, L. E. Pfeifer-Meister, M. L. DeMarche, B. R. Johnson, B. A. Roy,  
593 G. T. Bailes, A. A. Nelson, W. F. Morris, and D. F. Doak. 2021a. Climate warming  
594 threatens the persistence of a community of disturbance-adapted native annual plants.  
595 *Ecology* 102:e03464.
- 596 Reed, P. B., M. L. Peterson, L. E. Pfeifer-Meister, W. F. Morris, D. F. Doak, B. A. Roy, B. R.  
597 Johnson, G. T. Bailes, A. A. Nelson, and S. D. Bridgham. 2021b. Climate manipulations  
598 differentially affect plant population dynamics within versus beyond northern range limits.  
599 *Journal of Ecology* 109:664–675.
- 600 Reed, P. B., L. E. Pfeifer-Meister, B. A. Roy, B. R. Johnson, G. T. Bailes, A. A. Nelson, M. C.  
601 Boulay, S. T. Hamman, S. D. Bridgham, L. E. Pfeifer-Meister, B. A. Roy, B. R. Johnson, G.  
602 T. Bailes, A. A. Nelson, M. C. Boulay, S. T. Hamman, and S. D. Bridgham. 2019. Prairie

603 plant phenology driven more by temperature than moisture in climate manipulations across  
604 a latitudinal gradient in the Pacific Northwest, USA. *Ecology and Evolution* 9:3637–3650.  
605 Reed, P. B., L. E. Pfeifer-Meister, B. A. Roy, B. R. Johnson, G. T. Bailes, A. A. Nelson, and S.  
606 D. Bridgham. 2021c. Introduced annuals mediate climate-driven community change in  
607 Mediterranean prairies of the Pacific Northwest, USA. *Diversity and Distributions* 00:1–12.  
608 Saxton, K. E., and W. J. Rawls. 2006. Soil water characteristic estimates by texture and organic  
609 matter for hydrologic solutions. *Soil Science Society of America Journal* 70:1569–1578.  
610 Selosse, M. A., F. Richard, X. He, and S. W. Simard. 2006, November 1. Mycorrhizal networks:  
611 des liaisons dangereuses? Elsevier Current Trends.  
612 Silva, L. C. R. 2015. From air to land: understanding water resources through plant-based  
613 multidisciplinary research. *Trends in plant science* 20:399–401.  
614 Silva, L. C. R., and H. Lambers. 2021. Soil-plant-atmosphere interactions: structure, function,  
615 and predictive scaling for climate change mitigation. *Plant and Soil*:1–23.  
616 Silva, L. C. R., A. Salamanca-Jimenez, T. A. Doane, and W. R. Horwath. 2015. Carbon dioxide  
617 level and form of soil nitrogen regulate assimilation of atmospheric ammonia in young  
618 trees. *Scientific reports* 5:13141.  
619 Simard, S. W., D. A. Perry, M. D. Jones, D. D. Myrold, D. M. Durall, and R. Molina. 1997. Net  
620 transfer of carbon between ectomycorrhizal tree species in the field. *Nature* 388:579–582.  
621 Smith, S. E., and D. J. (David J. ) Read. 2008. Mycorrhizal symbiosis. Academic Press.  
622 Soudzilovskaia, N. A., S. Vaessen, M. Barcelo, J. He, S. Rahimlou, K. Abarenkov, M. C.  
623 Brundrett, S. I. F. Gomes, V. Merckx, and L. Tedersoo. 2020. FungalRoot: global online  
624 database of plant mycorrhizal associations. *New Phytologist* 227:955–966.  
625 Sperling, O., L. C. R. Silva, A. Tixier, G. Thérroux-Rancourt, and M. A. Zwieniecki. 2017.  
626 Temperature gradients assist carbohydrate allocation within trees. *Scientific Reports*  
627 7:3265.  
628 Tedersoo, L., M. Bahram, and M. Zobel. 2020. How mycorrhizal associations drive plant  
629 population and community biology. *Science* 367.  
630 Vandegrift, R., B. A. Roy, L. Pfeifer-Meister, B. R. Johnson, and S. D. Bridgham. 2015. The  
631 herbaceous landlord: integrating the effects of symbiont consortia within a single host.  
632 *PeerJ* 3:e1379.  
633 Walder, F., and M. G. A. van der Heijden. 2015. Regulation of resource exchange in the  
634 arbuscular mycorrhizal symbiosis. *Nature Plants* 1.  
635 Ward, E. B., M. C. Duguid, S. E. Kuebbing, J. C. Lendemer, and M. A. Bradford. 2022. The  
636 functional role of ericoid mycorrhizal plants and fungi on carbon and nitrogen dynamics in  
637 forests. *New Phytologist*.  
638 Weremijewicz, J., L. da S. L. O. Sternberg, and D. P. Janos. 2016. Common mycorrhizal  
639 networks amplify competition by preferential mineral nutrient allocation to large host  
640 plants. *New Phytologist* 212:461–471.  
641 Werner, C., and M. Dubbert. 2016. Resolving rapid dynamics of soil-plant-atmosphere  
642 interactions. *New Phytologist* 210:767–769.  
643 Wilson, H., B. R. Johnson, B. Bohannan, L. E. Pfeifer-Meister, R. Mueller, and S. D. Bridgham.  
644 2016. Experimental warming decreases arbuscular mycorrhizal fungal colonization in  
645 prairie plants along a Mediterranean climate gradient. *PeerJ* 2016:1–22.  
646
