# Supplementary material for: Plant functional types and tissue stoichiometry explain nutrient transfer in common arbuscular mycorrhizal networks of temperate grasslands
Source: bioRxiv or medRxiv preprint supplement (doi:10.1101/2022.10.05.511035), 2024-07-18
Supplement: Supplementary file [file media-1.pdf]

**Title:** Agnostic fungi: plant traits and tissue stoichiometry explain nutrient transfer in common arbuscular mycorrhizal networks of temperate grasslands

**Authors:** Hilary Rose Dawson, Katherine L. Shek, Toby M. Maxwell, Paul B. Reed, Barbara Bomfim, Scott D. Bridgham, Brendan J. R. Bohannon, Lucas C.R. Silva

## Supplemental Information

**Table S1. List of species at each site with number of leaf samples per species.** Donor species are indicated in bold.

| Species                                                                       | Perenniality | Func. group          | WC  | TW  | DC  | Fungal symbiont  |
|-------------------------------------------------------------------------------|--------------|----------------------|-----|-----|-----|------------------|
| <i>Agrostis capillaris</i> L.                                                 | Perennial    | Grass                | 121 | --  | --  | AM <sup>1</sup>  |
| <i>Alopecurus pratensis</i> L.                                                | Perennial    | Grass                | --  | 210 | --  | AM <sup>1</sup>  |
| <i>Aphanes occidentalis</i> L.                                                | Annual       | Forb                 | 3   | --  | --  | AM* <sup>2</sup> |
| <i>Bromus diandrus</i> Roth                                                   | Annual       | Grass                | 49  | --  | --  | AM* <sup>1</sup> |
| <i>Bromus hordeaceus</i> L.                                                   | Annual       | Grass                | 35  | 42  | 96  | AM* <sup>1</sup> |
| <i>Elymus repens</i> (L.) Gould                                               | Perennial    | Grass                | --  | --  | 63  | AM* <sup>1</sup> |
| <i>Eriophyllum lanatum</i> (Pursh) Forbes                                     | Perennial    | Forb                 | 8   | --  | --  | AM <sup>2</sup>  |
| <i>Festuca idahoensis</i> Elmer ssp. <i>roemeri</i> (Pavlick) S. Aiken        | Perennial    | Grass                | 18  | --  | --  | AM* <sup>1</sup> |
| <i>Geranium dissectum</i> L.                                                  | Annual       | Forb                 | 15  | 81  | --  | AM <sup>2</sup>  |
| <i>Holcus lanatus</i> L.                                                      | Perennial    | Grass                | --  | 6   | --  | AM <sup>1</sup>  |
| <i>Koeleria macrantha</i> (Ledeb.) Schult.                                    | Perennial    | Grass                | 18  | --  | --  | AM <sup>2</sup>  |
| <i>Lotus corniculatus</i> L.                                                  | Perennial    | Forb                 | --  | 9   | --  | AM <sup>1</sup>  |
| <b><i>Schedonorus arundinaceus</i> (Schreb.) Dumort.</b>                      | Perennial    | Grass                | --  | --  | 130 | AM <sup>1</sup>  |
| <b><i>Sidalcea malviflora</i> ssp. <i>virgata</i> (DC.) A. Gray ex Benth.</b> | Perennial    | Forb                 | 66  | 129 | 119 | AM <sup>3</sup>  |
| <i>Trifolium subterraneum</i> L.                                              | Annual       | Forb                 | 48  | --  | --  | AM <sup>1</sup>  |
| <i>Veronica arvensis</i> L.                                                   | Annual       | Forb                 | 3   | --  | --  | AM <sup>1</sup>  |
| <i>Vicia sativa</i> L.                                                        | Annual       | Forb                 | --  | 14  | --  | AM* <sup>1</sup> |
| <i>Vulpia</i> spp.                                                            | Annual       | Grass                | 54  | 8   | 21  | AM <sup>1</sup>  |
|                                                                               |              | <b>Total samples</b> | 438 | 499 | 429 |                  |

Notes: Fungal symbiont data derived from <sup>1</sup>Chaudhary et al. (2016), <sup>2</sup>Soudzilovskaia et al. (2020), and <sup>3</sup>Dickie et al. (2013). \* indicates “to genus,” that strategy was extrapolated from a sister species given a lack of data on this species. Nutrient-use strategies include arbuscular mycorrhizal (AM) and nitrogen fixation (N-fixer).

**Table S2. Collection dates for each time point at each site.** Days since labeling given in parentheses after date.

| Site                             | Label application<br>(time point 0) | Time point 1 | Time point 2 | Time point 3 |
|----------------------------------|-------------------------------------|--------------|--------------|--------------|
| <i>Ideal days since labeling</i> | 0                                   | 4            | 10           | 21           |
| <b>Northern</b>                  | June 10                             | June 14 (4)  | June 20 (10) | July 2 (22)  |
| <b>Middle</b>                    | May 29                              | June 3 (5)   | June 11 (13) | June 18 (20) |
| <b>Southern</b>                  | May 9                               | May 13 (4)   | May 22 (9)   | May 30 (21)  |

**Table S3. List of fungal ASVs by plant perenniality.**

| Fungal taxon                  | No. of perennial<br>plants assoc. with | No. of annual plants<br>assoc. with |
|-------------------------------|----------------------------------------|-------------------------------------|
| <i>Acaulospora</i> sp877      | 13                                     | 0                                   |
| <i>Claroideoglossum</i> sp744 | 20                                     | 7                                   |
| <i>Claroideoglossum</i> sp745 | 18                                     | 5                                   |
| <i>Claroideoglossum</i> sp746 | 18                                     | 7                                   |
| <i>Claroideoglossum</i> sp749 | 14                                     | 4                                   |
| <i>Claroideoglossum</i> sp751 | 25                                     | 10                                  |
| <i>Claroideoglossum</i> sp757 | 11                                     | 1                                   |
| <i>Claroideoglossum</i> sp758 | 11                                     | 1                                   |
| <i>Claroideoglossum</i> sp781 | 18                                     | 13                                  |
| <i>Claroideoglossum</i> sp782 | 59                                     | 36                                  |
| <i>Claroideoglossum</i> sp783 | 38                                     | 20                                  |
| <i>Claroideoglossum</i> sp784 | 47                                     | 21                                  |
| <i>Claroideoglossum</i> sp811 | 19                                     | 9                                   |
| <i>Claroideoglossum</i> sp812 | 12                                     | 4                                   |
| <i>Claroideoglossum</i> sp813 | 15                                     | 10                                  |
| <i>Claroideoglossum</i> sp815 | 21                                     | 11                                  |
| <i>Claroideoglossum</i> sp816 | 19                                     | 7                                   |
| <i>Claroideoglossum</i> sp817 | 30                                     | 8                                   |
| <i>Glomus</i> sp1024          | 11                                     | 1                                   |
| <i>Glomus</i> sp1025          | 12                                     | 4                                   |
| <i>Glomus</i> sp1029          | 23                                     | 4                                   |
| <i>Glomus</i> sp1031          | 20                                     | 7                                   |

| <b>Fungal taxon</b>  | <b>No. of perennial plants assoc. with</b> | <b>No. of annual plants assoc. with</b> |
|----------------------|--------------------------------------------|-----------------------------------------|
| <i>Glomus sp104</i>  | 12                                         | 3                                       |
| <i>Glomus sp113</i>  | 23                                         | 10                                      |
| <i>Glomus sp114</i>  | 6                                          | 16                                      |
| <i>Glomus sp115</i>  | 21                                         | 15                                      |
| <i>Glomus sp1349</i> | 13                                         | 8                                       |
| <i>Glomus sp1351</i> | 18                                         | 8                                       |
| <i>Glomus sp1352</i> | 15                                         | 5                                       |
| <i>Glomus sp148</i>  | 22                                         | 11                                      |
| <i>Glomus sp149</i>  | 12                                         | 6                                       |
| <i>Glomus sp150</i>  | 27                                         | 14                                      |
| <i>Glomus sp168</i>  | 21                                         | 12                                      |
| <i>Glomus sp169</i>  | 13                                         | 6                                       |
| <i>Glomus sp170</i>  | 15                                         | 6                                       |
| <i>Glomus sp177</i>  | 11                                         | 1                                       |
| <i>Glomus sp191</i>  | 14                                         | 10                                      |
| <i>Glomus sp470</i>  | 15                                         | 6                                       |
| <i>Glomus sp472</i>  | 14                                         | 4                                       |
| <i>Glomus sp488</i>  | 13                                         | 2                                       |
| <i>Glomus sp539</i>  | 13                                         | 3                                       |
| <i>Glomus sp541</i>  | 19                                         | 3                                       |
| <i>Glomus sp565</i>  | 15                                         | 7                                       |
| <i>Glomus sp566</i>  | 12                                         | 1                                       |
| <i>Glomus sp612</i>  | 13                                         | 3                                       |
| <i>Glomus sp614</i>  | 11                                         | 6                                       |
| <i>Glomus sp648</i>  | 12                                         | 2                                       |
| <i>Glomus sp651</i>  | 25                                         | 10                                      |
| <i>Glomus sp661</i>  | 11                                         | 4                                       |
| <i>Glomus sp662</i>  | 14                                         | 3                                       |
| <i>Glomus sp663</i>  | 12                                         | 8                                       |
| <i>Glomus sp667</i>  | 13                                         | 1                                       |
| <i>Glomus sp668</i>  | 14                                         | 3                                       |

| <b>Fungal taxon</b>         | <b>No. of perennial plants assoc. with</b> | <b>No. of annual plants assoc. with</b> |
|-----------------------------|--------------------------------------------|-----------------------------------------|
| <i>Glomus sp669</i>         | 14                                         | 5                                       |
| <i>Glomus sp670</i>         | 20                                         | 2                                       |
| <i>Glomus sp692</i>         | 14                                         | 1                                       |
| <i>Glomus sp700</i>         | 11                                         | 2                                       |
| <i>Glomus sp701</i>         | 12                                         | 12                                      |
| <i>Glomus sp703</i>         | 19                                         | 13                                      |
| <i>Glomus sp83</i>          | 11                                         | 0                                       |
| <i>Glomus sp85</i>          | 12                                         | 3                                       |
| <i>Glomus sp904</i>         | 18                                         | 3                                       |
| <i>Glomus sp905</i>         | 11                                         | 2                                       |
| <i>Glomus sp906</i>         | 17                                         | 6                                       |
| <i>Glomus sp917</i>         | 29                                         | 12                                      |
| <i>Glomus sp918</i>         | 85                                         | 48                                      |
| <i>Glomus sp919</i>         | 45                                         | 32                                      |
| <i>Glomus sp92</i>          | 11                                         | 0                                       |
| <i>Glomus sp920</i>         | 53                                         | 33                                      |
| <i>Glomus sp921</i>         | 17                                         | 3                                       |
| <i>Glomus sp938</i>         | 14                                         | 8                                       |
| <i>Glomus sp986</i>         | 12                                         | 1                                       |
| <i>Paraglomus sp301</i>     | 19                                         | 4                                       |
| <i>Paraglomus sp302</i>     | 26                                         | 5                                       |
| <i>Paraglomus sp303</i>     | 15                                         | 4                                       |
| <i>Paraglomus sp304</i>     | 25                                         | 5                                       |
| <i>Scutellospora sp1080</i> | 12                                         | 6                                       |
| <i>Unknown sp21</i>         | 12                                         | 4                                       |

Table only includes fungal species associated with at least 10 plants.

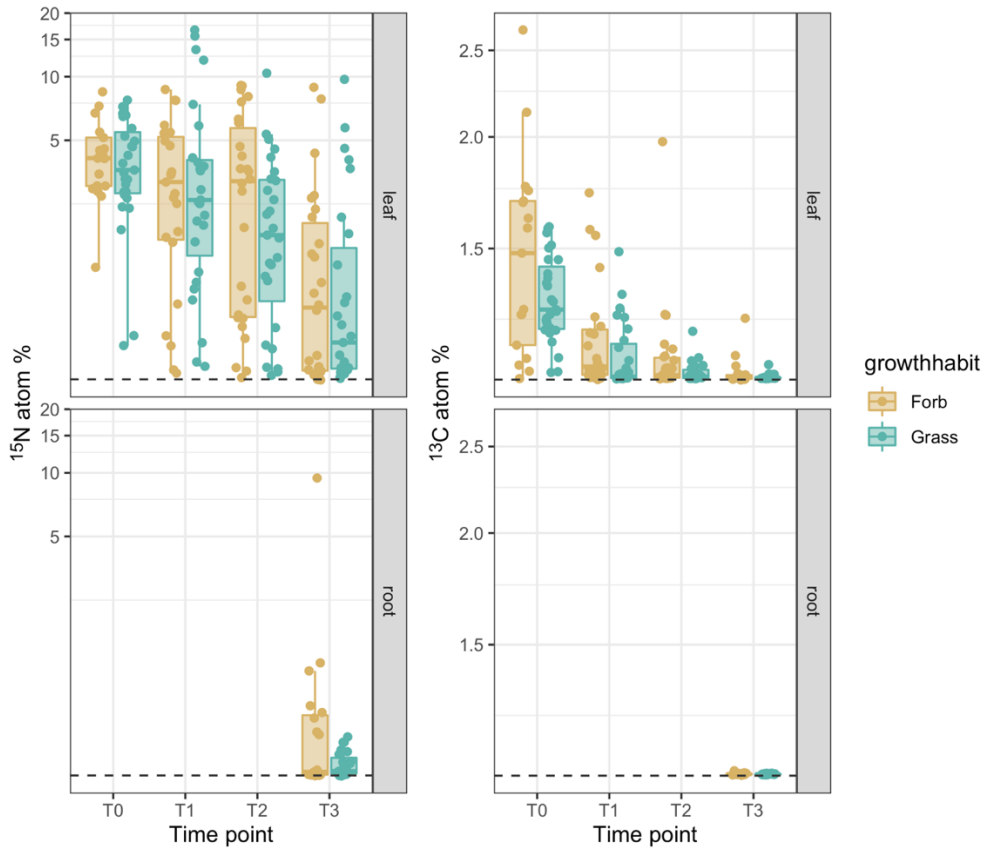

**Figure S1. Enrichment decreases over time in labelled plants.** Time points roughly correspond with T0 = time of labelling, T1 = 4 days later, T2 = 10 days later, T3 = 21 days later. Y-axis is in log<sub>10</sub> scale.

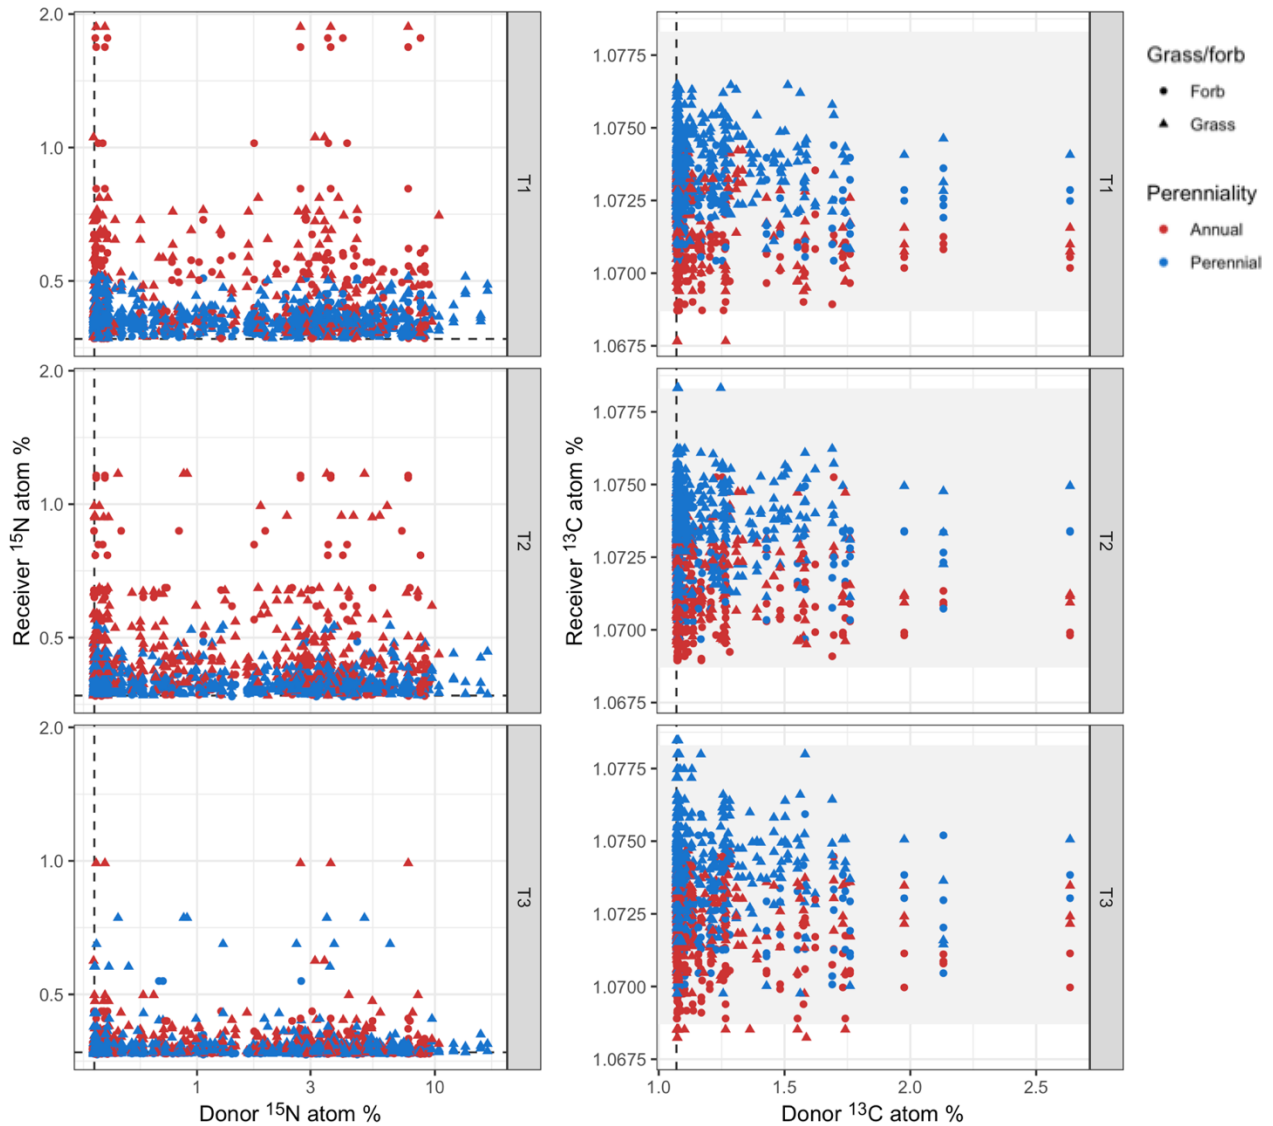

**Figure S2. Receiver enrichment did not correlate with donor enrichment.** Dashed lines indicate natural abundance means; grey boxes indicate range of natural abundance variation shown in Figure 2. (Grey boxes are too small to be visible for  $^{15}\text{N}$ .)  $^{15}\text{N}$  axes are log10 scaled. Note there is a sizeable difference between X- and Y-axes of both elements. Time point facets are time point 1 (~4 days post label), time point 2 (~10 days post label), and time point 3 (~21 days post label). Donors are all sampled at time point 0 (immediately after labelling). Note that five plots are missing from this graph (one each from northern/high diversity/control, northern/low diversity/rain exclusion, central/high diversity/rain exclusion, central/low diversity/rain exclusion, southern/high diversity/control) due to a lack of donor DNA data.

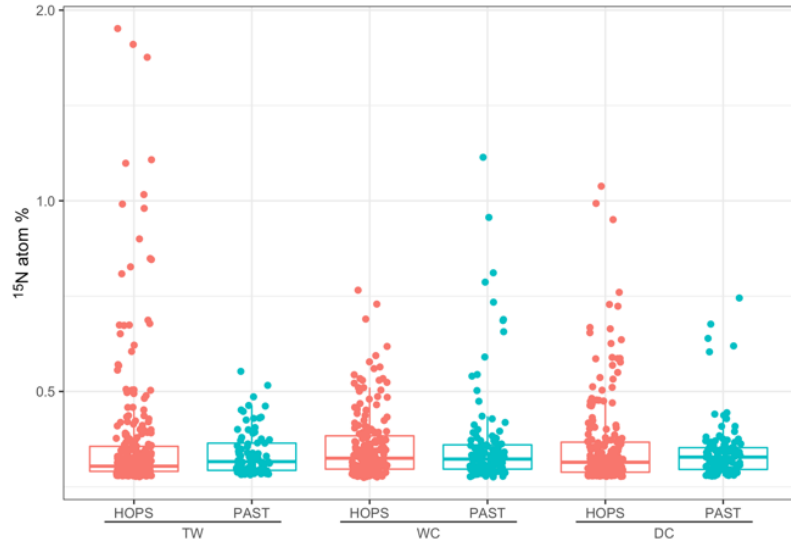

**Figure S3. No trend in  $^{15}\text{N}$  enrichment across site and rain exclusion treatment.** Y-axis is in  $\log_{10}$  scale.

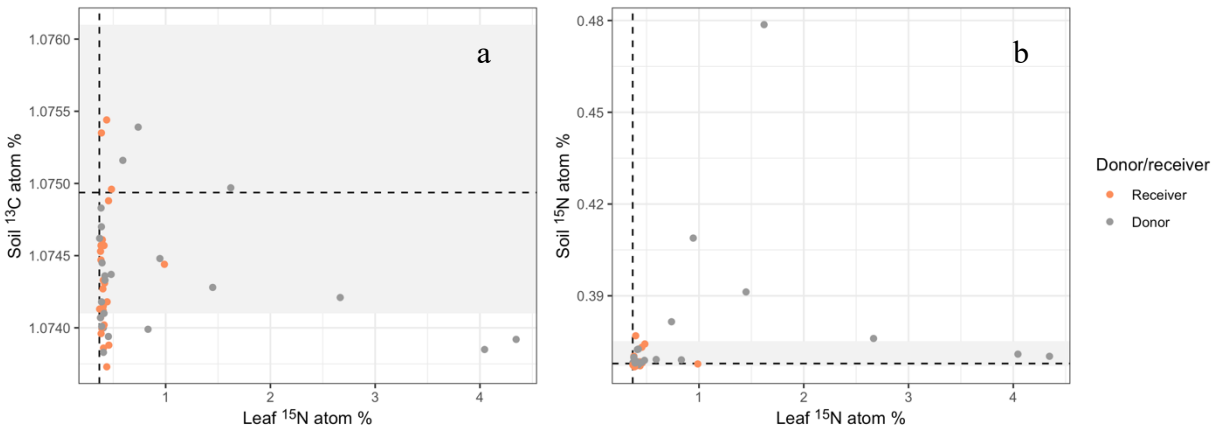

**Figure S4. Limited soil enrichment 21 days after labelling.** Dashed lines indicate average baseline enrichment. Grey boxes indicate range of baseline enrichment. Samples are subset to individuals most highly enriched with foliar  $^{15}\text{N}$  at each site by restored prairie/introduced pasture as well as their associated donors.

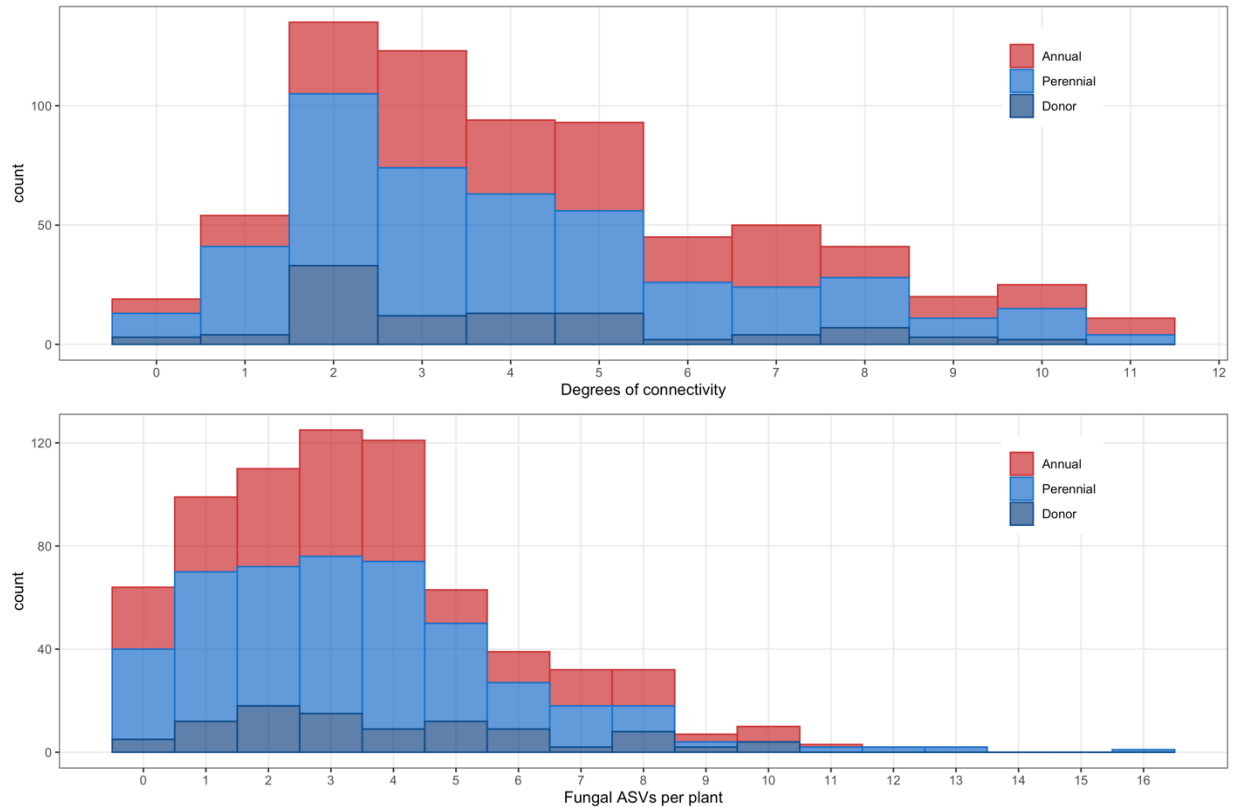

**Figure S5. Histogram of connectivity metrics showing left skew.** Degrees of connectivity indicate how many plants an individual shared at least one fungal ASV with in the same plot. Data are from time point 1 (approximately four days after labeling). Donors are the plants that we applied the isotopic label to.

## SI References

- Chaudhary, V. B., Rúa, M. A., Antoninka, A., Bever, J. D., Cannon, J., Craig, A., Duchicela, J., Frame, A., Gardes, M., Gehring, C., Ha, M., Hart, M., Hopkins, J., Ji, B., Johnson, N. C., Kaonongbua, W., Karst, J., Koide, R. T., Lamit, L. J., ... Hoeksema, J. D. (2016). Data Descriptor: MycoDB, a global database of plant response to mycorrhizal fungi. *Nature*, 3:160028. <https://doi.org/10.1038/sdata.2016.28>
- Dickie, I. A., Martínez-García, L. B., Koele, N., Grelet, G. A., Tylianakis, J. M., Peltzer, D. A., & Richardson, S. J. (2013). Mycorrhizas and mycorrhizal fungal communities throughout ecosystem development. *Plant and Soil*, 367(1–2), 11–39. <https://doi.org/10.1007/s11104-013-1609-0>
- Soudzilovskaia, N. A., Vaessen, S., Barcelo, M., He, J., Rahimlou, S., Abarenkov, K., Brundrett, M. C., Gomes, S. I. F., Merckx, V., & Tedersoo, L. (2020). FungalRoot: global online database of plant mycorrhizal associations. *New Phytologist*, 227(3), 955–966. <https://doi.org/10.1111/nph.16569>
