# Supplementary material for: Plant functional types and tissue stoichiometry explain nutrient transfer in common arbuscular mycorrhizal networks of temperate grasslands
Source: bioRxiv or medRxiv preprint supplement (doi:10.1101/2022.10.05.511035), 2024-07-18
Supplement: Supplementary file [file media-1.pdf]

**Title:** Agnostic fungi: plant traits and tissue stoichiometry explain nutrient transfer in common arbuscular mycorrhizal networks of temperate grasslands

**Authors:** Hilary Rose Dawson, Katherine L. Shek, Toby M. Maxwell, Paul B. Reed, Barbara Bomfim, Scott D. Bridgham, Brendan J. R. Bohannon, Lucas C.R. Silva

## Supplemental Information

**Table S1. List of species at each site with number of leaf samples per species.** Donor species are indicated in bold.

| Species                                                                           | Annual/<br>perennial | Grass/forb               | WC  | TW  | DC  | Fungal<br>symbiont |
|-----------------------------------------------------------------------------------|----------------------|--------------------------|-----|-----|-----|--------------------|
| <i>Agrostis capillaris</i> L.                                                     | Perennial            | Grass                    | 121 | --  | --  | AM <sup>1</sup>    |
| <i>Alopecurus pratensis</i> L.                                                    | Perennial            | Grass                    | --  | 210 | --  | AM <sup>1</sup>    |
| <i>Aphanes occidentalis</i> L.                                                    | Annual               | Forb                     | 3   | --  | --  | AM* <sup>2</sup>   |
| <i>Bromus diandrus</i> Roth                                                       | Annual               | Grass                    | 49  | --  | --  | AM* <sup>1</sup>   |
| <i>Bromus hordeaceus</i> L.                                                       | Annual               | Grass                    | 35  | 42  | 96  | AM* <sup>1</sup>   |
| <i>Elymus repens</i> (L.) Gould                                                   | Perennial            | Grass                    | --  | --  | 63  | AM* <sup>1</sup>   |
| <i>Eriophyllum lanatum</i> (Pursh) Forbes                                         | Perennial            | Forb                     | 8   | --  | --  | AM <sup>2</sup>    |
| <i>Festuca idahoensis</i> Elmer ssp. <i>roemeri</i><br>(Pavlick) S. Aiken         | Perennial            | Grass                    | 18  | --  | --  | AM* <sup>1</sup>   |
| <i>Geranium dissectum</i> L.                                                      | Annual               | Forb                     | 15  | 81  | --  | AM <sup>2</sup>    |
| <i>Holcus lanatus</i> L.                                                          | Perennial            | Grass                    | --  | 6   | --  | AM <sup>1</sup>    |
| <i>Koeleria macrantha</i> (Ledeb.) Schult.                                        | Perennial            | Grass                    | 18  | --  | --  | AM <sup>2</sup>    |
| <i>Lotus corniculatus</i> L.                                                      | Perennial            | Forb                     | --  | 9   | --  | AM <sup>1</sup>    |
| <b><i>Schedonorus arundinaceus</i><br/>(Schreb.) Dumort.</b>                      | Perennial            | Grass                    | --  | --  | 130 | AM <sup>1</sup>    |
| <b><i>Sidalcea malviflora</i> ssp. <i>virgata</i><br/>(DC.) A. Gray ex Benth.</b> | Perennial            | Forb                     | 66  | 129 | 119 | AM <sup>3</sup>    |
| <i>Trifolium subterraneum</i> L.                                                  | Annual               | Forb                     | 48  | --  | --  | AM <sup>1</sup>    |
| <i>Veronica arvensis</i> L.                                                       | Annual               | Forb                     | 3   | --  | --  | AM <sup>1</sup>    |
| <i>Vicia sativa</i> L.                                                            | Annual               | Forb                     | --  | 14  | --  | AM* <sup>1</sup>   |
| <i>Vulpia</i> spp.                                                                | Annual               | Grass                    | 54  | 8   | 21  | AM <sup>1</sup>    |
|                                                                                   |                      | <b>Total<br/>samples</b> | 438 | 499 | 429 |                    |

Notes: Fungal symbiont data derived from <sup>1</sup>Chaudhary et al. (2016), <sup>2</sup>Soudzilovskaia et al. (2020), and <sup>3</sup>Dickie et al. (2013). \* indicates “to genus,” that strategy was extrapolated from a sister species given a lack of data on this species. Nutrient-use strategies include arbuscular mycorrhizal (AM) and nitrogen fixation (N-fixer).

**Table S2. Collection dates for each time point at each site.** Days since labeling given in parentheses after date.

| Site                             | Label application (time point 0) | Time point 1 | Time point 2 | Time point 3 |
|----------------------------------|----------------------------------|--------------|--------------|--------------|
| <i>Ideal days since labeling</i> | 0                                | 4            | 10           | 21           |
| <b>Northern</b>                  | June 10                          | June 14 (4)  | June 20 (10) | July 2 (22)  |
| <b>Middle</b>                    | May 29                           | June 3 (5)   | June 11 (13) | June 18 (20) |
| <b>Southern</b>                  | May 9                            | May 13 (4)   | May 22 (9)   | May 30 (21)  |

**Table S3. Baseline values used to calculate amount derived from label (DFL).**

| Site    | Drought treatment        | Roots         |       |               |       | Leaves           |            |               |       |               |       |
|---------|--------------------------|---------------|-------|---------------|-------|------------------|------------|---------------|-------|---------------|-------|
|         |                          | <i>N</i> atm% | ±SD   | <i>C</i> atm% | ±SD   | Annual/perennial | Grass/forb | <i>N</i> atm% | ±SD   | <i>C</i> atm% | ±SD   |
| North   | Control                  | 0.370         | 0.001 | 1.073         | 0.001 | Annual           | Forb       | 0.367         | 0.001 | 1.07          | 0.001 |
|         |                          |               |       |               |       |                  | Grass      | 0.367         | 0.000 | 1.071         | 0.003 |
|         |                          |               |       |               |       | Perennial        | Forb       | 0.367         | 0.000 | 1.072         | 0.001 |
|         |                          |               |       |               |       |                  | Grass      | 0.368         | 0.000 | 1.075         | 0.001 |
|         | Rain exclusion treatment | 0.370         | 0.001 | 1.073         | 0.001 | Annual           | Forb       | 0.367         | 0.001 | 1.072         | 0.001 |
|         |                          |               |       |               |       |                  | Grass      | 0.367         | 0.000 | 1.073         | 0.000 |
|         |                          |               |       |               |       | Perennial        | Forb       | 0.367         | 0.000 | 1.072         | 0.002 |
|         |                          |               |       |               |       |                  | Grass      | 0.368         | 0.000 | 1.075         | 0.001 |
| Central | Control                  | 0.368         | 0.001 | 1.073         | 0.001 | Annual           | Forb       | 0.367         | 0.001 | 1.071         | 0.001 |
|         |                          |               |       |               |       |                  | Grass      | 0.366         | 0.001 | 1.073         | 0.001 |
|         |                          |               |       |               |       | Perennial        | Forb       | 0.368         | 0.003 | 1.071         | 0.001 |
|         |                          |               |       |               |       |                  | Grass      | 0.367         | 0.003 | 1.074         | 0.002 |
|         | Rain exclusion treatment | 0.368         | 0.001 | 1.073         | 0.001 | Annual           | Forb       | 0.367         | 0.001 | 1.071         | 0.001 |
|         |                          |               |       |               |       |                  | Grass      | 0.367         | 0.001 | 1.072         | 0.001 |
|         |                          |               |       |               |       | Perennial        | Forb       | 0.366         | 0.000 | 1.071         | 0.001 |
|         |                          |               |       |               |       |                  | Grass      | 0.366         | 0.000 | 1.075         | 0.002 |
| South   | Control                  | 0.368         | 0.000 | 1.074         | 0.001 | Annual           | Forb       | 0.366         | 0.000 | 1.071         | 0.000 |
|         |                          |               |       |               |       |                  | Grass      | 0.368         | 0.001 | 1.074         | 0.001 |
|         |                          |               |       |               |       | Perennial        | Forb       | 0.367         | 0.000 | 1.074         | 0.001 |
|         |                          |               |       |               |       |                  | Grass      | 0.367         | 0.000 | 1.074         | 0.000 |
|         | Rain exclusion treatment | 0.368         | 0.001 | 1.074         | 0.001 | Annual           | Forb       | 0.366         | 0.000 | 1.071         | 0.000 |
|         |                          |               |       |               |       |                  | Grass      | 0.367         | 0.001 | 1.074         | 0.002 |
|         |                          |               |       |               |       | Perennial        | Forb       | 0.367         | 0.001 | 1.074         | 0.001 |
|         |                          |               |       |               |       |                  | Grass      | 0.367         | 0.000 | 1.074         | 0.001 |

**Table S4. ANOVA results effects on leaf carbon derived from label (%CDFL).** Only receiver leaves enriched with <sup>13</sup>C with associated DNA data were included in the analysis (n = 92). Leaf %NDFL results available in Table 1.

|                                                     | DF       | $\chi^2$ | P-value          |
|-----------------------------------------------------|----------|----------|------------------|
| <i>Fixed effects</i>                                |          |          |                  |
| <b>Annual/perennial</b>                             | <b>1</b> | 22.91    | <b>&lt;0.001</b> |
| <b>Grass/forb</b>                                   | 1        | 12.59    | <b>&lt;0.001</b> |
| <b>Same species as donor</b>                        | 1        | 11.76    | <b>0.001</b>     |
| Degree of connectivity                              | 1        | 1.77     | 0.183            |
| iWUE                                                | 1        | 0.18     | 0.674            |
| C:N                                                 | 1        | 2.30     | 0.130            |
| <b>Site</b>                                         | <b>2</b> | 6.32     | <b>0.043</b>     |
| Drought treatment                                   | 1        | 1.27     | 0.260            |
| Restoration treatment                               | 1        | 2.80     | 0.094            |
| Distance from donor                                 | 1        | 0.00     | 0.958            |
| Time from labelling                                 | 1        | 1.38     | 0.241            |
| <b>Annual/perennial:<br/>Grass/forb interaction</b> | NA       | NA       | NA               |
| <i>Random effect</i>                                |          |          |                  |
| <b>Plot</b>                                         |          |          | <b>&lt;0.001</b> |

**Table S5. List of fungal ASVs by annuals and perennials.**

| <b>Fungal taxon</b>           | <b>No. of perennial plants assoc. with</b> | <b>No. of annual plants assoc. with</b> |
|-------------------------------|--------------------------------------------|-----------------------------------------|
| <i>Acaulospora sp877</i>      | 13                                         | 0                                       |
| <i>Claroideoglossum sp744</i> | 20                                         | 7                                       |
| <i>Claroideoglossum sp745</i> | 18                                         | 5                                       |
| <i>Claroideoglossum sp746</i> | 18                                         | 7                                       |
| <i>Claroideoglossum sp749</i> | 14                                         | 4                                       |
| <i>Claroideoglossum sp751</i> | 25                                         | 10                                      |
| <i>Claroideoglossum sp757</i> | 11                                         | 1                                       |
| <i>Claroideoglossum sp758</i> | 11                                         | 1                                       |
| <i>Claroideoglossum sp781</i> | 18                                         | 13                                      |
| <i>Claroideoglossum sp782</i> | 59                                         | 36                                      |
| <i>Claroideoglossum sp783</i> | 38                                         | 20                                      |
| <i>Claroideoglossum sp784</i> | 47                                         | 21                                      |
| <i>Claroideoglossum sp811</i> | 19                                         | 9                                       |
| <i>Claroideoglossum sp812</i> | 12                                         | 4                                       |
| <i>Claroideoglossum sp813</i> | 15                                         | 10                                      |
| <i>Claroideoglossum sp815</i> | 21                                         | 11                                      |
| <i>Claroideoglossum sp816</i> | 19                                         | 7                                       |
| <i>Claroideoglossum sp817</i> | 30                                         | 8                                       |
| <i>Glomus sp1024</i>          | 11                                         | 1                                       |
| <i>Glomus sp1025</i>          | 12                                         | 4                                       |
| <i>Glomus sp1029</i>          | 23                                         | 4                                       |
| <i>Glomus sp1031</i>          | 20                                         | 7                                       |
| <i>Glomus sp104</i>           | 12                                         | 3                                       |
| <i>Glomus sp113</i>           | 23                                         | 10                                      |
| <i>Glomus sp114</i>           | 6                                          | 16                                      |
| <i>Glomus sp115</i>           | 21                                         | 15                                      |
| <i>Glomus sp1349</i>          | 13                                         | 8                                       |
| <i>Glomus sp1351</i>          | 18                                         | 8                                       |
| <i>Glomus sp1352</i>          | 15                                         | 5                                       |
| <i>Glomus sp148</i>           | 22                                         | 11                                      |

| <b>Fungal taxon</b> | <b>No. of perennial plants assoc. with</b> | <b>No. of annual plants assoc. with</b> |
|---------------------|--------------------------------------------|-----------------------------------------|
| <i>Glomus sp149</i> | 12                                         | 6                                       |
| <i>Glomus sp150</i> | 27                                         | 14                                      |
| <i>Glomus sp168</i> | 21                                         | 12                                      |
| <i>Glomus sp169</i> | 13                                         | 6                                       |
| <i>Glomus sp170</i> | 15                                         | 6                                       |
| <i>Glomus sp177</i> | 11                                         | 1                                       |
| <i>Glomus sp191</i> | 14                                         | 10                                      |
| <i>Glomus sp470</i> | 15                                         | 6                                       |
| <i>Glomus sp472</i> | 14                                         | 4                                       |
| <i>Glomus sp488</i> | 13                                         | 2                                       |
| <i>Glomus sp539</i> | 13                                         | 3                                       |
| <i>Glomus sp541</i> | 19                                         | 3                                       |
| <i>Glomus sp565</i> | 15                                         | 7                                       |
| <i>Glomus sp566</i> | 12                                         | 1                                       |
| <i>Glomus sp612</i> | 13                                         | 3                                       |
| <i>Glomus sp614</i> | 11                                         | 6                                       |
| <i>Glomus sp648</i> | 12                                         | 2                                       |
| <i>Glomus sp651</i> | 25                                         | 10                                      |
| <i>Glomus sp661</i> | 11                                         | 4                                       |
| <i>Glomus sp662</i> | 14                                         | 3                                       |
| <i>Glomus sp663</i> | 12                                         | 8                                       |
| <i>Glomus sp667</i> | 13                                         | 1                                       |
| <i>Glomus sp668</i> | 14                                         | 3                                       |
| <i>Glomus sp669</i> | 14                                         | 5                                       |
| <i>Glomus sp670</i> | 20                                         | 2                                       |
| <i>Glomus sp692</i> | 14                                         | 1                                       |
| <i>Glomus sp700</i> | 11                                         | 2                                       |
| <i>Glomus sp701</i> | 12                                         | 12                                      |
| <i>Glomus sp703</i> | 19                                         | 13                                      |
| <i>Glomus sp83</i>  | 11                                         | 0                                       |
| <i>Glomus sp85</i>  | 12                                         | 3                                       |

| <b>Fungal taxon</b>         | <b>No. of perennial plants assoc. with</b> | <b>No. of annual plants assoc. with</b> |
|-----------------------------|--------------------------------------------|-----------------------------------------|
| <i>Glomus sp904</i>         | 18                                         | 3                                       |
| <i>Glomus sp905</i>         | 11                                         | 2                                       |
| <i>Glomus sp906</i>         | 17                                         | 6                                       |
| <i>Glomus sp917</i>         | 29                                         | 12                                      |
| <i>Glomus sp918</i>         | 85                                         | 48                                      |
| <i>Glomus sp919</i>         | 45                                         | 32                                      |
| <i>Glomus sp92</i>          | 11                                         | 0                                       |
| <i>Glomus sp920</i>         | 53                                         | 33                                      |
| <i>Glomus sp921</i>         | 17                                         | 3                                       |
| <i>Glomus sp938</i>         | 14                                         | 8                                       |
| <i>Glomus sp986</i>         | 12                                         | 1                                       |
| <i>Paraglomus sp301</i>     | 19                                         | 4                                       |
| <i>Paraglomus sp302</i>     | 26                                         | 5                                       |
| <i>Paraglomus sp303</i>     | 15                                         | 4                                       |
| <i>Paraglomus sp304</i>     | 25                                         | 5                                       |
| <i>Scutellospora sp1080</i> | 12                                         | 6                                       |
| <i>Unknown sp21</i>         | 12                                         | 4                                       |

Table only includes fungal species associated with at least 10 plants.

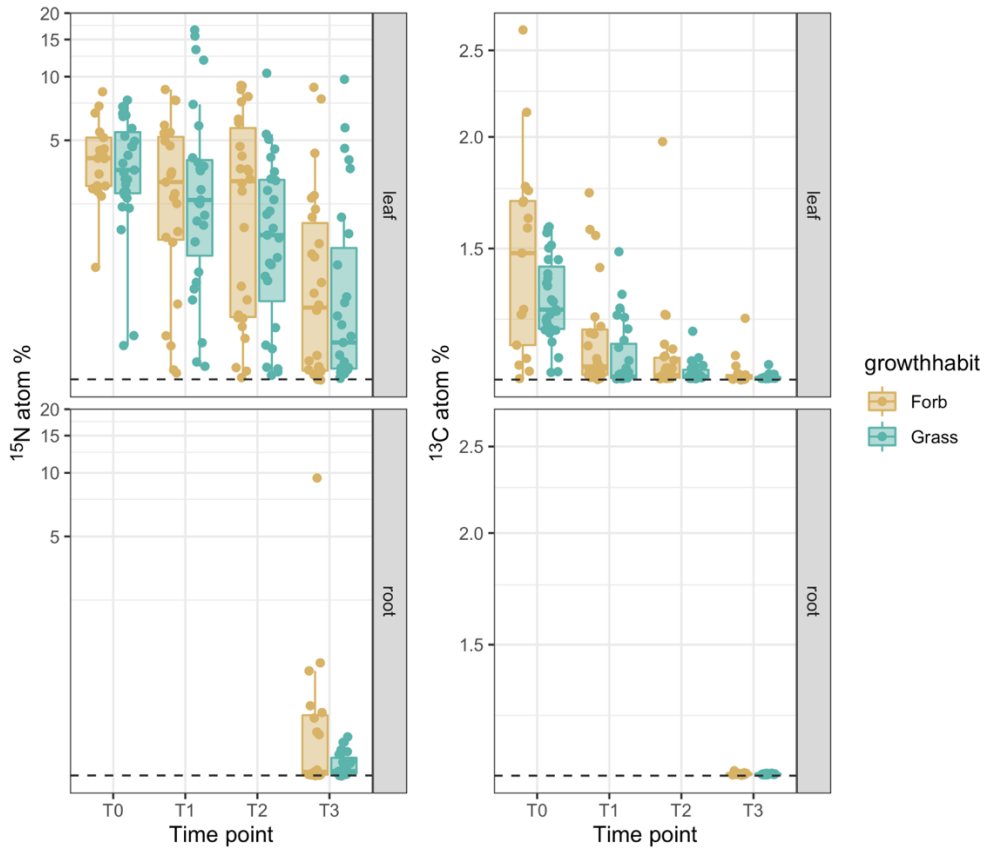

**Figure S1. Enrichment decreases over time in labelled plants.** Time points roughly correspond with T0 = time of labelling, T1 = 4 days later, T2 = 10 days later, T3 = 21 days later. Y-axis is in log<sub>10</sub> scale.

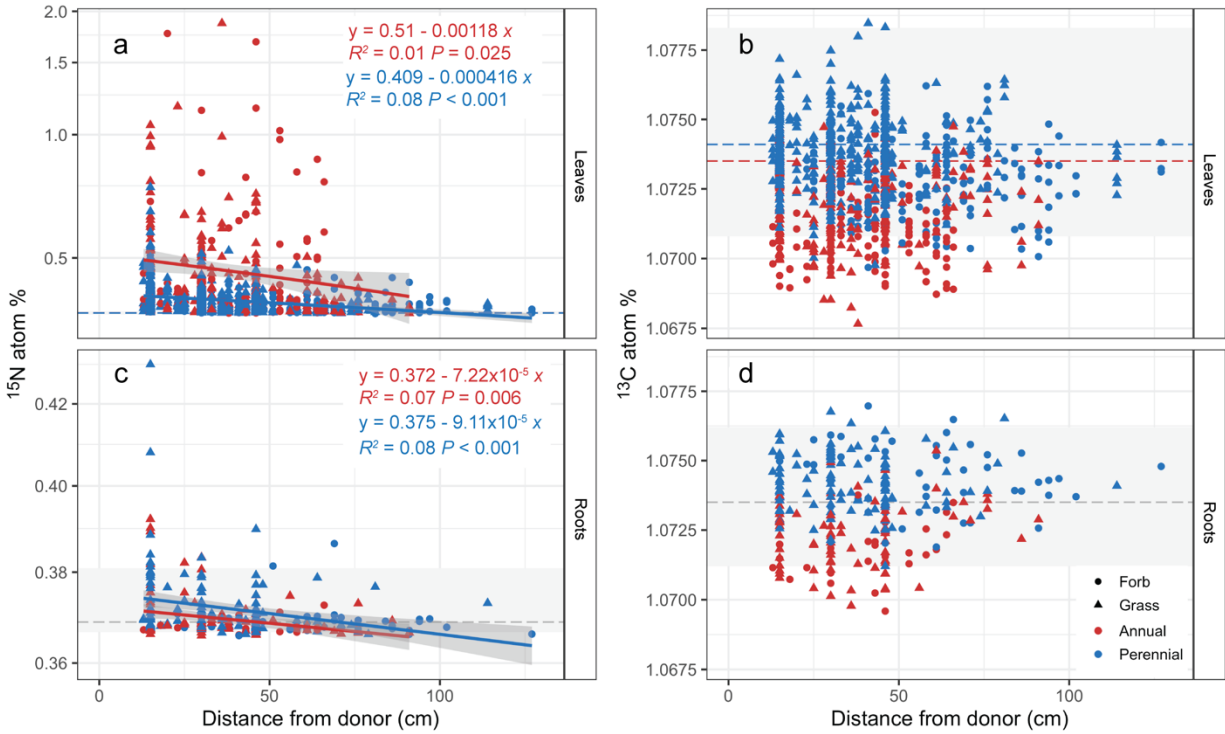

**Figure S2. Decreased receiver enrichment with distance from donor in leaves and roots.**

Dashed lines indicate natural abundance means; grey boxes indicate range of natural abundance variation shown in Fig. 2. There is no systematic enrichment of  $^{13}\text{C}$ ; however, there is high  $^{15}\text{N}$  enrichment in leaves. Y-axes are log<sub>10</sub> scale. Note that the y-axis scales are different between  $^{15}\text{N}$  leaves and  $^{15}\text{N}$  roots. See Fig. 4 and Fig. S\*\* for boxplots of enrichment data by grass/forb and annual/perennial.



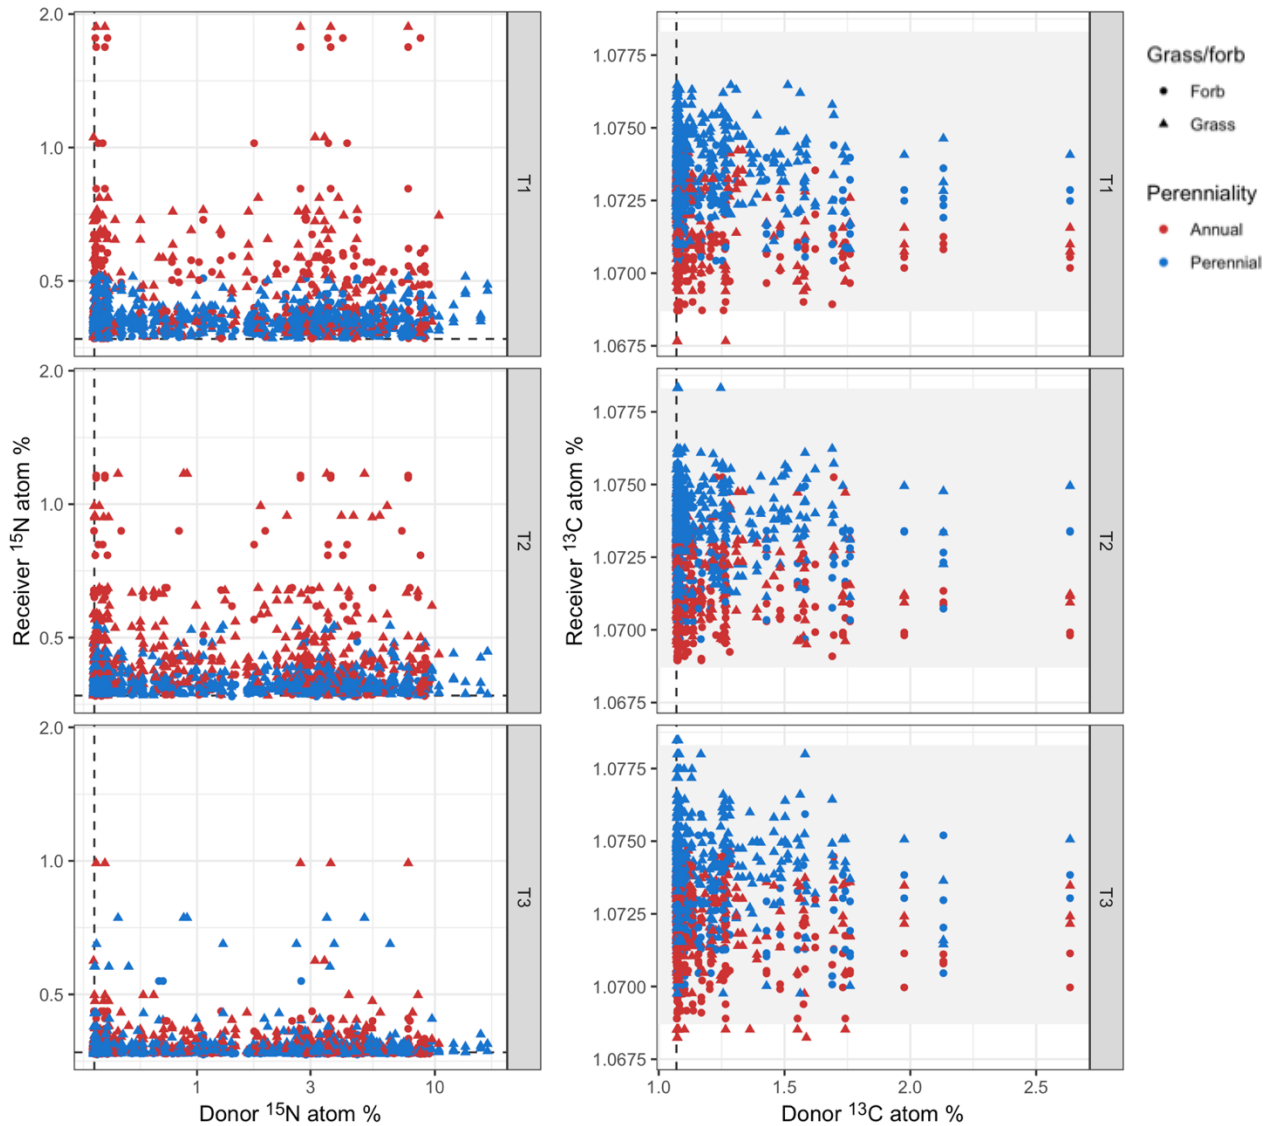

**Figure S3. Receiver enrichment did not correlate with donor enrichment.** Dashed lines indicate natural abundance means; grey boxes indicate range of natural abundance variation shown in Figure 2. (Grey boxes are too small to be visible for  $^{15}\text{N}$ .)  $^{15}\text{N}$  axes are log10 scaled. Note there is a sizeable difference between X- and Y-axes of both elements. Time point facets are time point 1 (~4 days post label), time point 2 (~10 days post label), and time point 3 (~21 days post label). Donors are all sampled at time point 0 (immediately after labelling). Note that five plots are missing from this graph (one each from northern/high diversity/control, northern/low diversity/rain exclusion, central/high diversity/rain exclusion, central/low diversity/rain exclusion, southern/high diversity/control) due to a lack of donor DNA data.

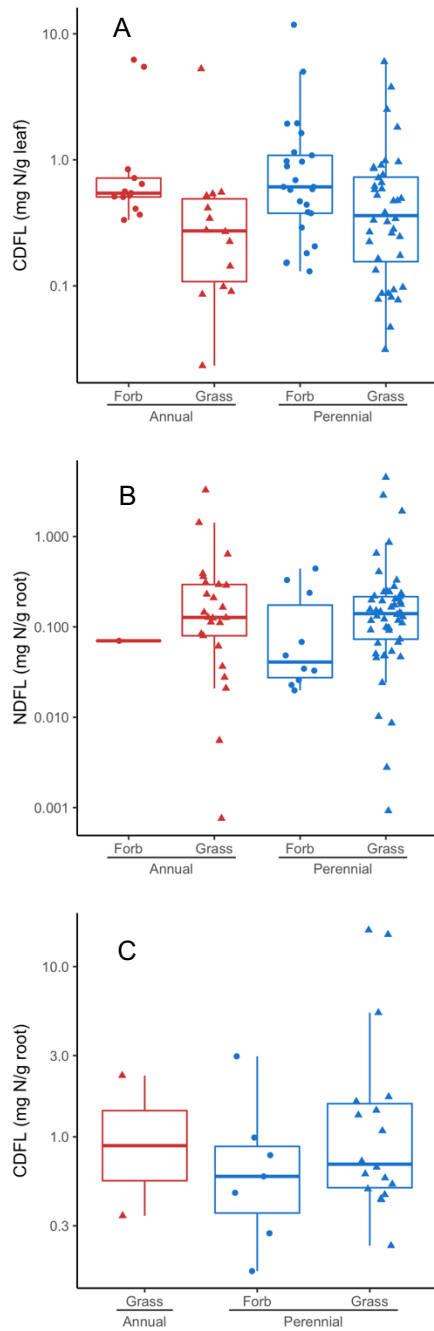

**Figure S3: Enrichment derived from label for A) CDFL in leaves, B) NDFL in roots, and C) CDFL in roots.** Points represent enriched individual receiver plants with associated DNA data at one time point of sampling. In A all three post-enrichment time points are shown; in B and C only time point 3 is shown. Y-axis is log<sub>10</sub> scale. See Fig. S\*\* for values over distance and Fig. 4 for NDFL in leaves.

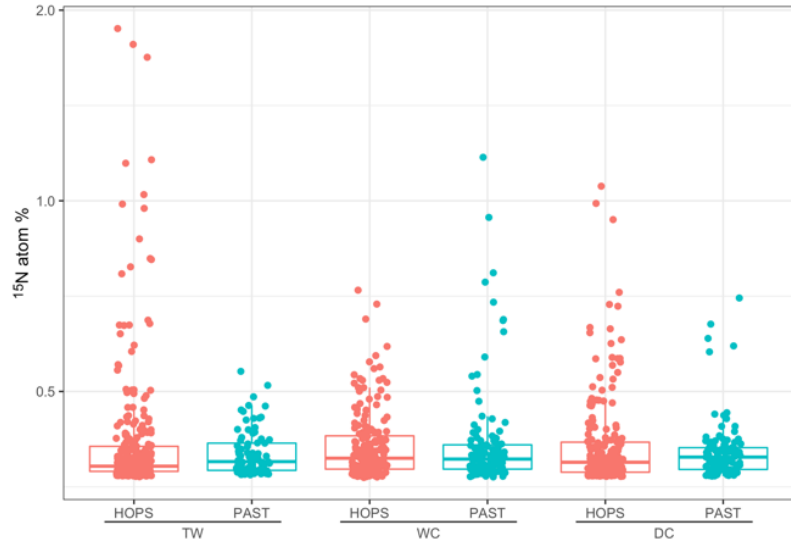

**Figure S5. No trend in  $^{15}\text{N}$  enrichment across site and rain exclusion treatment.** Y-axis is in log<sub>10</sub> scale. HOPS indicates restored prairie sites, PAST indicates pasture sites. Sites are ordered from north (TW) to central (WC) to south (DC).

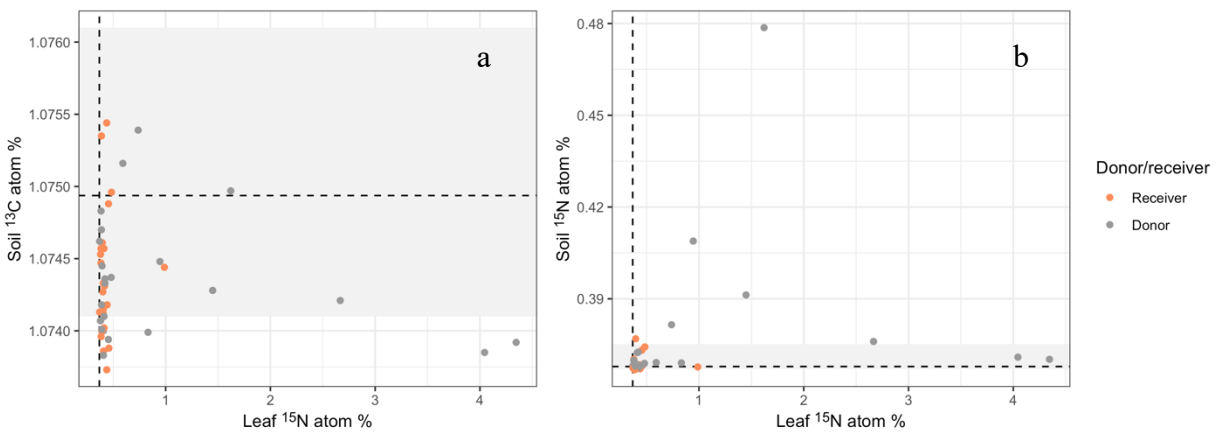

**Figure S6. Limited soil enrichment 21 days after labelling.** Dashed lines indicate average baseline enrichment. Grey boxes indicate range of baseline enrichment. Samples are subset to individuals most highly enriched with foliar  $^{15}\text{N}$  at each site by restored prairie/introduced pasture as well as their associated donors.

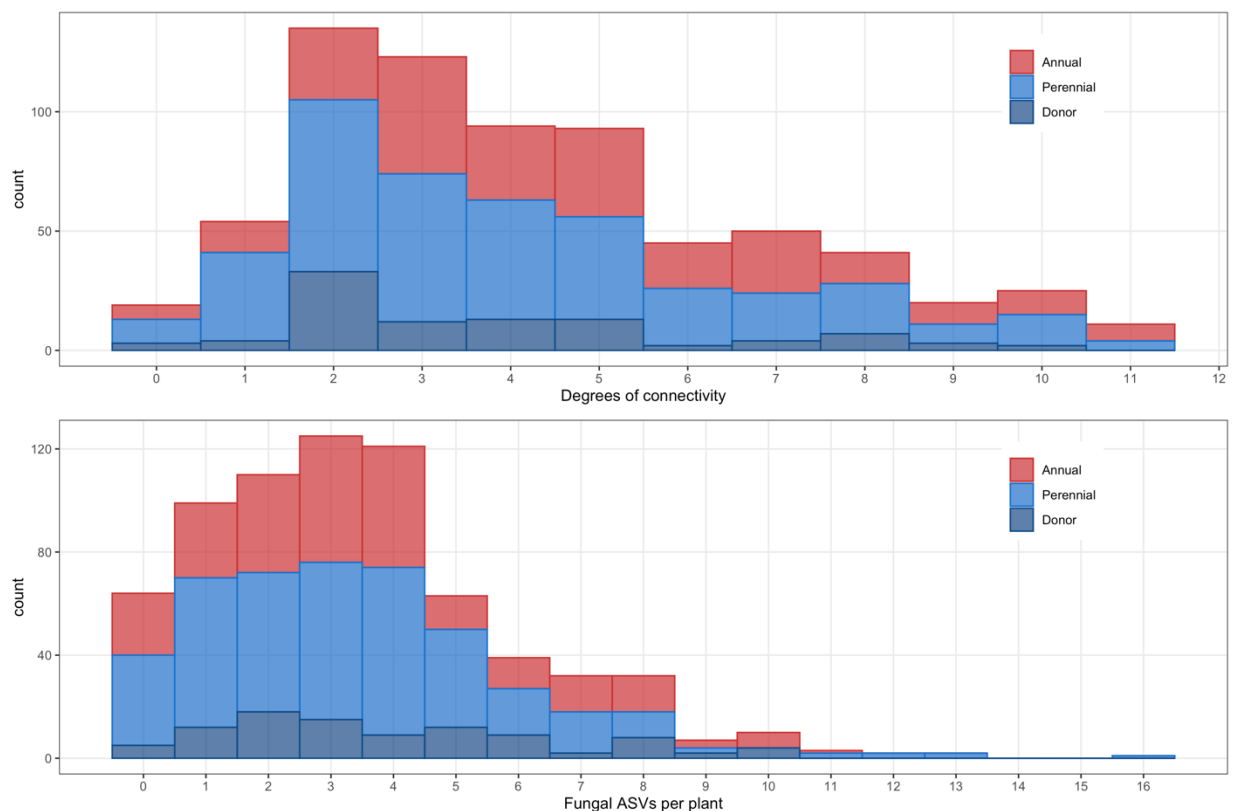

**Figure S7. Histogram of connectivity metrics showing left skew.** Degrees of connectivity indicate how many plants an individual shared at least one fungal ASV with in the same plot. Data are from time point 1 (approximately four days after labeling). Donors are the plants that we applied the isotopic label to.

## SI References

- Chaudhary, V. B., Rúa, M. A., Antoninka, A., Bever, J. D., Cannon, J., Craig, A., Duchicela, J., Frame, A., Gardes, M., Gehring, C., Ha, M., Hart, M., Hopkins, J., Ji, B., Johnson, N. C., Kaonongbua, W., Karst, J., Koide, R. T., Lamit, L. J., ... Hoeksema, J. D. (2016). Data Descriptor: MycoDB, a global database of plant response to mycorrhizal fungi. *Nature*, 3:160028. <https://doi.org/10.1038/sdata.2016.28>
- Dickie, I. A., Martínez-García, L. B., Koele, N., Grelet, G. A., Tylianakis, J. M., Peltzer, D. A., & Richardson, S. J. (2013). Mycorrhizas and mycorrhizal fungal communities throughout ecosystem development. *Plant and Soil*, 367(1–2), 11–39. <https://doi.org/10.1007/s11104-013-1609-0>
- Soudzilovskaia, N. A., Vaessen, S., Barcelo, M., He, J., Rahimlou, S., Abarenkov, K., Brundrett, M. C., Gomes, S. I. F., Merckx, V., & Tedersoo, L. (2020). FungalRoot: global online database of plant mycorrhizal associations. *New Phytologist*, 227(3), 955–966. <https://doi.org/10.1111/nph.16569>
